# Supplementary material for: Clarifying the Relationship Among Green Investment, Clean Energy Consumption, Carbon Emissions, and Economic Growth: A Provincial Panel Analysis of China
Source: Research Square preprint supplement (doi:10.21203/rs.3.rs-523905/v1), 2021-06-03
Supplement: Supplementary file 1 [file f1fcd229916de72332477b95.docx]

| province | year | GE | GI | PGDP | CO2 | TECH | STR | FDI |
| --- | --- | --- | --- | --- | --- | --- | --- | --- |
| bj | 2017 | 16.14 | 665.40 | 128994.11 | 70.06 | 18.59 | 0.81 | 243.29 |
| tj | 2017 | 7.59 | 71.20 | 118943.57 | 132.15 | 8.70 | 0.58 | 106.08 |
| hb | 2017 | 332.40 | 605.80 | 45387.00 | 541.90 | 6.13 | 0.44 | 84.90 |
| sx | 2017 | 234.82 | 278.20 | 42060.00 | 1521.41 | 2.07 | 0.52 | 16.90 |
| nmg | 2017 | 685.61 | 419.60 | 63764.00 | 765.07 | 1.17 | 0.50 | 31.50 |
| ln | 2017 | 420.18 | 219.20 | 53527.00 | 515.65 | 4.99 | 0.53 | 53.35 |
| jl | 2017 | 156.59 | 91.60 | 54838.00 | 214.52 | 2.05 | 0.46 | 17.54 |
| hlj | 2017 | 110.54 | 131.40 | 41916.00 | 355.33 | 3.10 | 0.56 | 58.57 |
| sh | 2017 | 17.26 | 160.40 | 126634.15 | 156.58 | 13.17 | 0.69 | 170.08 |
| js | 2017 | 380.41 | 715.40 | 107150.00 | 645.05 | 51.44 | 0.50 | 251.35 |
| zj | 2017 | 756.40 | 452.90 | 92057.01 | 401.44 | 37.71 | 0.52 | 179.02 |
| ah | 2017 | 137.96 | 505.00 | 43401.36 | 397.02 | 17.59 | 0.43 | 158.97 |
| fj | 2017 | 1079.47 | 224.40 | 82677.00 | 232.92 | 12.81 | 0.45 | 85.77 |
| jx | 2017 | 189.40 | 315.50 | 43424.37 | 179.01 | 7.06 | 0.43 | 114.64 |
| sd | 2017 | 245.94 | 948.80 | 72807.14 | 1101.80 | 20.49 | 0.48 | 178.57 |
| hn | 2017 | 162.52 | 641.30 | 46674.00 | 557.62 | 11.92 | 0.43 | 172.24 |
| hb | 2017 | 1563.11 | 434.50 | 60199.00 | 266.93 | 11.02 | 0.48 | 109.94 |
| hn | 2017 | 647.34 | 219.30 | 49558.00 | 275.97 | 7.79 | 0.50 | 144.75 |
| gd | 2017 | 1173.14 | 366.20 | 82686.00 | 533.20 | 62.78 | 0.54 | 229.07 |
| gx | 2017 | 783.13 | 184.10 | 38102.00 | 193.85 | 5.70 | 0.44 | 8.23 |
| hn | 2017 | 103.88 | 54.10 | 48430.00 | 60.75 | 0.46 | 0.56 | 23.06 |
| cq | 2017 | 257.54 | 222.10 | 65538.00 | 127.77 | 6.46 | 0.52 | 22.60 |
| sc | 2017 | 3095.92 | 308.20 | 44651.32 | 229.76 | 16.75 | 0.50 | 81.01 |
| gz | 2017 | 764.67 | 216.70 | 37956.06 | 340.34 | 3.46 | 0.45 | 8.24 |
| yn | 2017 | 2715.41 | 142.60 | 34221.00 | 198.22 | 2.87 | 0.48 | 9.63 |
| sx | 2017 | 227.24 | 314.50 | 57266.31 | 637.83 | 9.89 | 0.42 | 58.94 |
| gs | 2017 | 635.23 | 89.30 | 28496.50 | 173.99 | 2.44 | 0.54 | 0.44 |
| qh | 2017 | 465.40 | 41.10 | 44047.00 | 48.68 | 0.32 | 0.47 | 0.18 |
| nx | 2017 | 236.56 | 84.40 | 50765.00 | 226.24 | 0.86 | 0.47 | 3.11 |
| xj | 2017 | 641.90 | 385.50 | 44941.00 | 452.26 | 1.43 | 0.46 | 1.96 |
| bj | 2016 | 16.63 | 674.20 | 118198.00 | 74.94 | 18.91 | 0.80 | 130.29 |
| tj | 2016 | 6.03 | 53.50 | 115053.00 | 130.35 | 10.65 | 0.57 | 101.00 |
| hb | 2016 | 258.12 | 399.60 | 43062.00 | 614.57 | 5.48 | 0.42 | 73.54 |
| sx | 2016 | 172.23 | 525.70 | 35367.00 | 1433.11 | 2.00 | 0.56 | 23.32 |
| nmg | 2016 | 574.92 | 456.00 | 72064.00 | 754.62 | 1.07 | 0.44 | 39.67 |
| ln | 2016 | 379.20 | 176.20 | 49990.00 | 508.94 | 5.26 | 0.52 | 29.99 |
| jl | 2016 | 167.99 | 84.10 | 53868.00 | 214.18 | 1.89 | 0.43 | 22.74 |
| hlj | 2016 | 96.93 | 173.60 | 40432.00 | 365.37 | 3.53 | 0.54 | 58.96 |
| sh | 2016 | 7.15 | 205.30 | 116562.00 | 158.23 | 11.99 | 0.70 | 185.14 |
| js | 2016 | 306.35 | 765.60 | 96840.00 | 653.12 | 51.24 | 0.50 | 245.43 |
| zj | 2016 | 823.64 | 650.60 | 84916.00 | 379.18 | 39.31 | 0.50 | 175.77 |
| ah | 2016 | 118.01 | 498.20 | 39561.00 | 380.18 | 17.26 | 0.41 | 147.67 |
| fj | 2016 | 1107.23 | 189.60 | 74707.00 | 217.15 | 13.04 | 0.43 | 81.95 |
| jx | 2016 | 228.43 | 313.30 | 40106.00 | 176.67 | 6.05 | 0.42 | 104.41 |
| sd | 2016 | 186.39 | 780.80 | 68733.00 | 1096.72 | 21.29 | 0.47 | 168.26 |
| hn | 2016 | 126.61 | 359.80 | 42575.00 | 536.84 | 9.47 | 0.42 | 169.93 |
| hb | 2016 | 1462.52 | 464.70 | 55665.00 | 253.98 | 9.52 | 0.46 | 101.29 |
| hn | 2016 | 661.77 | 200.40 | 46382.00 | 265.51 | 6.78 | 0.47 | 128.52 |
| gd | 2016 | 1198.70 | 367.50 | 75213.00 | 506.86 | 50.57 | 0.53 | 233.49 |
| gx | 2016 | 772.02 | 204.20 | 38027.00 | 182.48 | 5.92 | 0.40 | 8.88 |
| hn | 2016 | 87.79 | 30.30 | 44347.00 | 62.26 | 0.37 | 0.55 | 21.31 |
| cq | 2016 | 251.83 | 144.20 | 59433.00 | 142.18 | 5.95 | 0.50 | 27.90 |
| sc | 2016 | 2876.03 | 290.40 | 40003.00 | 250.14 | 14.25 | 0.47 | 79.77 |
| gz | 2016 | 789.78 | 118.40 | 33246.00 | 348.36 | 2.53 | 0.45 | 9.67 |
| yn | 2016 | 2454.50 | 145.80 | 31093.00 | 184.54 | 2.37 | 0.47 | 8.67 |
| sx | 2016 | 175.94 | 317.40 | 51015.00 | 590.05 | 6.96 | 0.42 | 50.12 |
| gs | 2016 | 510.14 | 117.60 | 27643.00 | 169.72 | 2.03 | 0.51 | 1.16 |
| qh | 2016 | 400.77 | 56.30 | 43531.00 | 53.15 | 0.33 | 0.43 | 0.15 |
| nx | 2016 | 190.83 | 101.20 | 47194.00 | 189.72 | 0.61 | 0.45 | 2.54 |
| xj | 2016 | 499.77 | 312.80 | 40564.00 | 410.85 | 1.41 | 0.46 | 4.01 |
| bj | 2015 | 9.72 | 412.50 | 106497.00 | 83.39 | 15.63 | 0.80 | 129.96 |
| tj | 2015 | 6.47 | 126.40 | 107960.09 | 61.24 | 8.00 | 0.52 | 211.34 |
| hb | 2015 | 205.63 | 397.50 | 40255.00 | 639.37 | 4.41 | 0.40 | 61.78 |
| sx | 2015 | 118.30 | 257.60 | 34993.00 | 1474.50 | 1.49 | 0.53 | 28.70 |
| nmg | 2015 | 501.29 | 536.40 | 71100.54 | 753.80 | 0.89 | 0.40 | 33.66 |
| ln | 2015 | 290.01 | 291.10 | 65092.00 | 502.37 | 4.22 | 0.46 | 51.85 |
| jl | 2015 | 131.88 | 110.80 | 51086.00 | 218.85 | 1.48 | 0.39 | 21.27 |
| hlj | 2015 | 81.69 | 156.90 | 39461.56 | 347.80 | 3.46 | 0.51 | 55.45 |
| sh | 2015 | 5.14 | 220.30 | 103795.54 | 161.65 | 10.00 | 0.67 | 184.59 |
| js | 2015 | 256.45 | 952.50 | 89426.00 | 634.16 | 42.83 | 0.48 | 242.75 |
| zj | 2015 | 749.36 | 439.70 | 77643.69 | 381.50 | 30.73 | 0.49 | 169.60 |
| ah | 2015 | 72.98 | 439.70 | 35996.56 | 392.85 | 12.77 | 0.39 | 136.19 |
| fj | 2015 | 805.72 | 229.70 | 67965.52 | 234.47 | 8.31 | 0.42 | 76.83 |
| jx | 2015 | 191.98 | 235.50 | 36724.00 | 170.41 | 3.69 | 0.39 | 94.73 |
| sd | 2015 | 131.73 | 693.20 | 64168.30 | 1052.18 | 19.32 | 0.45 | 163.01 |
| hn | 2015 | 124.75 | 295.80 | 39122.61 | 537.07 | 7.44 | 0.40 | 160.86 |
| hb | 2015 | 1347.02 | 246.80 | 50653.85 | 252.88 | 7.42 | 0.45 | 89.48 |
| hn | 2015 | 601.24 | 537.60 | 42753.86 | 250.52 | 5.45 | 0.45 | 115.64 |
| gd | 2015 | 1100.46 | 292.60 | 69283.00 | 497.95 | 35.59 | 0.50 | 268.75 |
| gx | 2015 | 755.60 | 261.20 | 35190.00 | 173.23 | 4.37 | 0.39 | 17.22 |
| hn | 2015 | 23.65 | 22.20 | 40818.00 | 65.35 | 0.31 | 0.54 | 20.06 |
| cq | 2015 | 231.53 | 139.00 | 53398.00 | 139.19 | 8.28 | 0.48 | 37.72 |
| sc | 2015 | 2678.95 | 216.00 | 36775.00 | 253.58 | 11.07 | 0.44 | 99.96 |
| gz | 2015 | 828.22 | 137.50 | 29847.25 | 327.57 | 1.83 | 0.45 | 4.19 |
| yn | 2015 | 2275.53 | 140.80 | 28806.00 | 178.65 | 1.76 | 0.45 | 29.92 |
| sx | 2015 | 170.20 | 240.40 | 47626.00 | 529.36 | 7.49 | 0.41 | 46.21 |
| gs | 2015 | 521.80 | 122.60 | 26165.26 | 176.58 | 1.46 | 0.49 | 1.10 |
| qh | 2015 | 443.59 | 34.90 | 41252.00 | 44.05 | 0.26 | 0.41 | 0.55 |
| nx | 2015 | 136.82 | 86.90 | 43805.00 | 193.38 | 0.44 | 0.44 | 1.86 |
| xj | 2015 | 416.26 | 288.70 | 40036.00 | 379.09 | 1.23 | 0.46 | 4.53 |
| bj | 2014 | 9.62 | 624.40 | 99994.52 | 88.98 | 13.81 | 0.78 | 90.41 |
| tj | 2014 | 5.69 | 278.90 | 105231.35 | 143.93 | 6.34 | 0.49 | 188.67 |
| hb | 2014 | 185.84 | 455.50 | 39984.28 | 624.59 | 3.00 | 0.37 | 63.72 |
| sx | 2014 | 100.73 | 293.20 | 35202.00 | 1552.01 | 1.57 | 0.44 | 29.52 |
| nmg | 2014 | 427.41 | 562.30 | 71046.37 | 806.00 | 0.64 | 0.40 | 41.72 |
| ln | 2014 | 270.43 | 271.50 | 65164.00 | 520.81 | 3.79 | 0.42 | 274.23 |
| jl | 2014 | 132.51 | 98.10 | 50162.29 | 234.97 | 1.19 | 0.36 | 19.66 |
| hlj | 2014 | 92.07 | 182.10 | 39226.33 | 350.35 | 3.19 | 0.46 | 51.56 |
| sh | 2014 | 3.41 | 250.00 | 97370.00 | 156.55 | 8.17 | 0.64 | 181.66 |
| js | 2014 | 235.83 | 880.60 | 83177.00 | 621.07 | 42.19 | 0.47 | 281.74 |
| zj | 2014 | 543.40 | 474.20 | 73002.05 | 380.79 | 26.14 | 0.47 | 157.97 |
| ah | 2014 | 53.73 | 428.70 | 34424.61 | 401.80 | 9.92 | 0.35 | 123.40 |
| fj | 2014 | 635.02 | 193.40 | 63471.66 | 229.16 | 5.81 | 0.40 | 71.15 |
| jx | 2014 | 143.88 | 231.20 | 34674.00 | 165.47 | 2.56 | 0.37 | 84.51 |
| sd | 2014 | 96.05 | 823.80 | 60879.10 | 997.83 | 15.86 | 0.43 | 151.95 |
| hn | 2014 | 105.67 | 295.10 | 37071.72 | 557.53 | 6.24 | 0.37 | 149.27 |
| hb | 2014 | 1384.17 | 316.50 | 47144.60 | 251.82 | 5.91 | 0.43 | 79.28 |
| hn | 2014 | 571.08 | 213.70 | 40270.54 | 255.97 | 4.42 | 0.43 | 102.66 |
| gd | 2014 | 993.30 | 303.10 | 63809.00 | 500.65 | 27.84 | 0.49 | 268.71 |
| gx | 2014 | 656.82 | 200.40 | 33089.61 | 183.50 | 3.23 | 0.38 | 10.01 |
| hn | 2014 | 29.46 | 21.10 | 38923.70 | 58.85 | 0.24 | 0.53 | 18.89 |
| cq | 2014 | 241.95 | 168.40 | 49062.00 | 139.12 | 5.53 | 0.47 | 42.33 |
| sc | 2014 | 2503.40 | 288.20 | 35128.10 | 298.40 | 9.12 | 0.43 | 102.88 |
| gz | 2014 | 700.82 | 170.40 | 26437.00 | 319.61 | 2.25 | 0.45 | 4.66 |
| yn | 2014 | 2120.57 | 152.00 | 27263.63 | 187.77 | 1.33 | 0.43 | 27.06 |
| sx | 2014 | 138.06 | 285.40 | 46928.59 | 502.04 | 5.62 | 0.37 | 41.76 |
| gs | 2014 | 468.98 | 143.50 | 26432.92 | 180.47 | 1.20 | 0.44 | 1.00 |
| qh | 2014 | 394.91 | 30.00 | 39671.00 | 62.53 | 0.15 | 0.37 | 0.50 |
| nx | 2014 | 83.12 | 78.60 | 41833.81 | 195.22 | 0.35 | 0.43 | 0.92 |
| xj | 2014 | 297.05 | 392.40 | 40648.00 | 366.26 | 1.02 | 0.42 | 4.17 |
| bj | 2013 | 8.03 | 433.50 | 94647.88 | 86.69 | 12.33 | 0.78 | 85.24 |
| tj | 2013 | 5.21 | 191.30 | 100105.43 | 151.03 | 6.09 | 0.48 | 168.29 |
| hb | 2013 | 172.32 | 490.00 | 38909.00 | 657.72 | 2.76 | 0.36 | 64.47 |
| sx | 2013 | 89.80 | 337.20 | 35136.00 | 1499.06 | 1.89 | 0.42 | 28.07 |
| nmg | 2013 | 392.58 | 506.80 | 67835.60 | 783.74 | 0.64 | 0.37 | 48.43 |
| ln | 2013 | 222.79 | 347.60 | 62068.00 | 529.86 | 4.60 | 0.39 | 290.40 |
| jl | 2013 | 172.55 | 105.40 | 47428.00 | 237.29 | 1.08 | 0.36 | 18.19 |
| hlj | 2013 | 103.40 | 298.50 | 37696.97 | 363.48 | 3.23 | 0.41 | 46.42 |
| sh | 2013 | 3.38 | 187.60 | 90993.00 | 181.78 | 8.65 | 0.63 | 167.80 |
| js | 2013 | 218.56 | 881.00 | 76535.00 | 638.44 | 50.45 | 0.45 | 332.59 |
| zj | 2013 | 529.01 | 390.40 | 68804.72 | 387.56 | 29.40 | 0.47 | 141.59 |
| ah | 2013 | 41.70 | 506.00 | 32000.89 | 387.18 | 9.34 | 0.34 | 106.88 |
| fj | 2013 | 512.66 | 282.90 | 58145.00 | 203.57 | 5.37 | 0.40 | 66.79 |
| jx | 2013 | 129.84 | 239.60 | 31930.00 | 162.19 | 1.69 | 0.35 | 75.51 |
| sd | 2013 | 78.92 | 848.00 | 56884.94 | 944.49 | 15.52 | 0.42 | 140.53 |
| hn | 2013 | 120.40 | 288.10 | 34211.49 | 594.42 | 5.59 | 0.36 | 134.57 |
| hb | 2013 | 1210.68 | 252.70 | 42825.76 | 252.92 | 5.08 | 0.42 | 68.88 |
| hn | 2013 | 513.63 | 233.90 | 36943.00 | 266.33 | 4.13 | 0.41 | 87.05 |
| gd | 2013 | 902.16 | 351.90 | 58860.00 | 493.09 | 26.43 | 0.49 | 249.52 |
| gx | 2013 | 491.46 | 217.80 | 30741.21 | 189.77 | 2.33 | 0.38 | 7.00 |
| hn | 2013 | 30.83 | 26.60 | 35663.00 | 51.97 | 0.24 | 0.53 | 18.11 |
| cq | 2013 | 179.03 | 173.30 | 44049.00 | 134.28 | 4.90 | 0.47 | 41.44 |
| sc | 2013 | 2002.83 | 234.00 | 32617.00 | 277.51 | 8.25 | 0.40 | 102.84 |
| gz | 2013 | 488.53 | 109.70 | 23151.00 | 314.25 | 1.74 | 0.47 | 5.77 |
| yn | 2013 | 1700.37 | 197.10 | 25322.00 | 195.78 | 1.15 | 0.42 | 25.15 |
| sx | 2013 | 116.21 | 221.70 | 43117.00 | 482.84 | 5.73 | 0.35 | 36.78 |
| gs | 2013 | 451.05 | 176.20 | 24538.85 | 181.47 | 1.10 | 0.41 | 0.71 |
| qh | 2013 | 436.35 | 36.70 | 36875.00 | 70.83 | 0.11 | 0.33 | 0.94 |
| nx | 2013 | 83.99 | 72.40 | 39613.00 | 187.76 | 0.32 | 0.42 | 1.48 |
| xj | 2013 | 302.96 | 318.70 | 37552.55 | 336.34 | 0.82 | 0.41 | 4.81 |
| bj | 2012 | 7.79 | 342.60 | 87474.74 | 95.94 | 9.23 | 0.77 | 80.42 |
| tj | 2012 | 2.37 | 157.50 | 93172.96 | 143.14 | 4.10 | 0.47 | 150.16 |
| hb | 2012 | 164.88 | 486.10 | 36584.49 | 642.31 | 2.32 | 0.35 | 58.05 |
| sx | 2012 | 89.77 | 328.20 | 33803.00 | 854.67 | 1.68 | 0.39 | 25.04 |
| nmg | 2012 | 326.89 | 445.10 | 63885.83 | 788.69 | 0.47 | 0.35 | 41.77 |
| ln | 2012 | 136.70 | 683.40 | 56731.00 | 543.27 | 4.12 | 0.38 | 267.93 |
| jl | 2012 | 114.00 | 103.40 | 43415.00 | 265.30 | 0.92 | 0.35 | 16.49 |
| hlj | 2012 | 83.28 | 218.10 | 35711.00 | 393.33 | 3.06 | 0.40 | 39.91 |
| sh | 2012 | 3.74 | 134.10 | 85373.00 | 168.52 | 8.27 | 0.60 | 151.85 |
| js | 2012 | 222.08 | 657.10 | 69374.00 | 619.99 | 47.27 | 0.43 | 357.60 |
| zj | 2012 | 549.59 | 375.40 | 63373.55 | 383.59 | 24.94 | 0.46 | 130.69 |
| ah | 2012 | 26.97 | 330.20 | 28792.32 | 355.91 | 7.49 | 0.33 | 86.40 |
| fj | 2012 | 503.63 | 222.50 | 52763.00 | 208.53 | 4.28 | 0.40 | 63.38 |
| jx | 2012 | 113.16 | 316.10 | 28800.00 | 146.46 | 1.25 | 0.35 | 68.24 |
| sd | 2012 | 70.14 | 739.10 | 51767.81 | 1007.56 | 12.86 | 0.40 | 123.53 |
| hn | 2012 | 153.58 | 209.50 | 31499.00 | 545.87 | 4.34 | 0.34 | 121.18 |
| hb | 2012 | 1424.31 | 285.50 | 38572.33 | 311.39 | 5.13 | 0.39 | 56.66 |
| hn | 2012 | 618.88 | 190.30 | 33479.76 | 275.30 | 3.57 | 0.40 | 72.80 |
| gd | 2012 | 882.81 | 260.20 | 54038.00 | 486.70 | 22.95 | 0.47 | 235.49 |
| gx | 2012 | 546.24 | 190.50 | 27951.71 | 192.85 | 1.36 | 0.35 | 7.49 |
| hn | 2012 | 17.59 | 44.70 | 32377.00 | 54.24 | 0.18 | 0.49 | 16.41 |
| cq | 2012 | 258.85 | 186.90 | 39548.00 | 149.36 | 3.89 | 0.47 | 35.24 |
| sc | 2012 | 1562.61 | 178.30 | 29608.00 | 289.71 | 6.63 | 0.39 | 98.01 |
| gz | 2012 | 590.94 | 68.90 | 19710.00 | 287.21 | 1.13 | 0.48 | 4.91 |
| yn | 2012 | 1265.71 | 132.40 | 22195.00 | 195.47 | 0.93 | 0.41 | 21.89 |
| sx | 2012 | 89.76 | 180.60 | 38564.00 | 405.13 | 4.36 | 0.35 | 29.36 |
| gs | 2012 | 385.47 | 121.40 | 21977.79 | 173.75 | 0.83 | 0.40 | 0.61 |
| qh | 2012 | 469.51 | 24.10 | 33181.00 | 58.56 | 0.08 | 0.33 | 2.06 |
| nx | 2012 | 54.96 | 55.70 | 36394.00 | 188.57 | 0.20 | 0.42 | 2.18 |
| xj | 2012 | 189.54 | 255.10 | 33796.29 | 333.44 | 0.70 | 0.36 | 4.08 |
| bj | 2011 | 7.48 | 213.10 | 81658.00 | 94.73 | 7.80 | 0.77 | 70.54 |
| tj | 2011 | 1.54 | 174.90 | 85213.00 | 149.14 | 3.85 | 0.46 | 130.56 |
| hb | 2011 | 112.31 | 623.90 | 33969.00 | 623.46 | 1.76 | 0.35 | 46.81 |
| sx | 2011 | 42.24 | 248.50 | 31489.00 | 766.12 | 1.28 | 0.35 | 20.73 |
| nmg | 2011 | 333.83 | 395.90 | 57974.00 | 740.52 | 0.38 | 0.35 | 40.41 |
| ln | 2011 | 109.53 | 376.50 | 50930.00 | 524.47 | 3.71 | 0.37 | 242.67 |
| jl | 2011 | 117.90 | 101.20 | 38460.00 | 264.67 | 0.82 | 0.35 | 14.81 |
| hlj | 2011 | 62.98 | 152.70 | 32819.00 | 381.24 | 2.34 | 0.36 | 34.57 |
| sh | 2011 | 3.24 | 144.80 | 82560.00 | 170.60 | 8.02 | 0.58 | 126.01 |
| js | 2011 | 199.87 | 575.80 | 63150.00 | 613.11 | 34.84 | 0.42 | 321.32 |
| zj | 2011 | 454.30 | 238.70 | 59249.00 | 398.62 | 17.71 | 0.44 | 116.66 |
| ah | 2011 | 25.49 | 267.50 | 25659.00 | 315.39 | 4.86 | 0.33 | 66.29 |
| fj | 2011 | 307.87 | 198.40 | 47377.00 | 210.15 | 3.23 | 0.40 | 62.01 |
| jx | 2011 | 81.22 | 241.20 | 26150.00 | 144.75 | 0.97 | 0.34 | 60.59 |
| sd | 2011 | 40.68 | 614.10 | 47335.00 | 976.56 | 10.96 | 0.38 | 111.60 |
| hn | 2011 | 117.33 | 163.30 | 28661.00 | 654.10 | 3.41 | 0.32 | 100.82 |
| hb | 2011 | 1172.68 | 259.80 | 34197.00 | 321.88 | 4.25 | 0.39 | 46.55 |
| hn | 2011 | 465.82 | 127.30 | 29880.00 | 269.56 | 2.95 | 0.39 | 61.50 |
| gd | 2011 | 784.52 | 332.60 | 50676.00 | 501.36 | 19.63 | 0.46 | 217.98 |
| gx | 2011 | 416.05 | 161.50 | 25326.00 | 173.34 | 0.81 | 0.34 | 10.14 |
| hn | 2011 | 15.67 | 28.00 | 28898.00 | 52.97 | 0.15 | 0.47 | 15.23 |
| cq | 2011 | 188.67 | 259.20 | 35017.00 | 150.71 | 3.20 | 0.47 | 58.26 |
| sc | 2011 | 1371.27 | 140.10 | 26133.00 | 280.38 | 4.97 | 0.38 | 94.81 |
| gz | 2011 | 355.26 | 64.90 | 16413.00 | 268.69 | 0.84 | 0.49 | 5.15 |
| yn | 2011 | 1019.05 | 119.20 | 19265.00 | 187.81 | 0.72 | 0.42 | 17.38 |
| sx | 2011 | 100.43 | 153.30 | 33464.00 | 344.52 | 3.22 | 0.35 | 23.55 |
| gs | 2011 | 318.00 | 59.60 | 19595.00 | 169.69 | 0.53 | 0.39 | 0.70 |
| qh | 2011 | 371.33 | 26.20 | 29522.00 | 50.10 | 0.07 | 0.32 | 1.69 |
| nx | 2011 | 29.88 | 57.40 | 33043.00 | 190.95 | 0.11 | 0.41 | 2.02 |
| xj | 2011 | 144.16 | 132.70 | 30087.00 | 286.31 | 0.47 | 0.34 | 3.35 |
| bj | 2010 | 7.20 | 231.40 | 73856.00 | 96.84 | 5.73 | 0.76 | 63.64 |
| tj | 2010 | 29.48 | 109.70 | 72994.00 | 134.29 | 2.60 | 0.46 | 108.49 |
| hb | 2010 | 66.84 | 370.90 | 28668.00 | 569.37 | 1.23 | 0.35 | 38.31 |
| sx | 2010 | 47.00 | 206.90 | 26397.00 | 654.05 | 0.79 | 0.37 | 7.14 |
| nmg | 2010 | 262.73 | 238.90 | 47347.00 | 562.50 | 0.29 | 0.36 | 35.59 |
| ln | 2010 | 91.07 | 206.50 | 42518.00 | 494.59 | 3.42 | 0.37 | 207.50 |
| jl | 2010 | 141.27 | 124.20 | 31599.00 | 225.77 | 0.64 | 0.36 | 12.80 |
| hlj | 2010 | 57.08 | 131.30 | 27076.00 | 351.54 | 1.03 | 0.37 | 27.59 |
| sh | 2010 | 11.40 | 134.00 | 76074.00 | 161.42 | 7.12 | 0.57 | 111.21 |
| js | 2010 | 192.86 | 466.40 | 53525.00 | 546.29 | 23.59 | 0.41 | 284.98 |
| zj | 2010 | 492.89 | 333.70 | 51711.00 | 375.77 | 12.07 | 0.44 | 110.02 |
| ah | 2010 | 23.67 | 179.90 | 20888.00 | 282.90 | 4.71 | 0.34 | 50.14 |
| fj | 2010 | 465.89 | 129.70 | 40025.00 | 179.64 | 2.20 | 0.40 | 58.03 |
| jx | 2010 | 119.09 | 156.50 | 21253.00 | 134.19 | 0.63 | 0.33 | 51.01 |
| sd | 2010 | 39.13 | 483.90 | 41106.00 | 929.12 | 8.09 | 0.36 | 91.68 |
| hn | 2010 | 99.69 | 132.20 | 24446.00 | 573.13 | 2.51 | 0.31 | 62.47 |
| hb | 2010 | 1290.28 | 146.80 | 27906.00 | 279.61 | 3.13 | 0.40 | 40.50 |
| hn | 2010 | 502.53 | 106.60 | 24719.00 | 231.70 | 2.24 | 0.40 | 51.84 |
| gd | 2010 | 749.08 | 1416.20 | 44669.00 | 445.06 | 15.29 | 0.45 | 202.61 |
| gx | 2010 | 488.42 | 164.10 | 20219.00 | 134.28 | 0.51 | 0.35 | 9.12 |
| hn | 2010 | 15.27 | 23.60 | 23831.00 | 44.91 | 0.10 | 0.48 | 15.12 |
| cq | 2010 | 170.53 | 176.30 | 28084.00 | 138.38 | 2.28 | 0.47 | 30.43 |
| sc | 2010 | 1224.42 | 89.00 | 21182.00 | 283.57 | 4.02 | 0.40 | 60.25 |
| gz | 2010 | 416.58 | 30.00 | 13119.00 | 246.76 | 0.44 | 0.47 | 2.95 |
| yn | 2010 | 818.78 | 106.20 | 15752.00 | 176.26 | 0.56 | 0.40 | 13.29 |
| sx | 2010 | 87.37 | 179.20 | 27133.00 | 308.25 | 2.29 | 0.36 | 18.20 |
| gs | 2010 | 289.24 | 63.90 | 16113.00 | 145.09 | 0.36 | 0.37 | 1.35 |
| qh | 2010 | 371.11 | 17.00 | 24115.00 | 37.14 | 0.06 | 0.35 | 2.19 |
| nx | 2010 | 35.80 | 34.50 | 26860.00 | 151.54 | 0.07 | 0.42 | 0.81 |
| xj | 2010 | 128.42 | 78.40 | 25034.00 | 240.82 | 0.36 | 0.33 | 2.37 |
| bj | 2009 | 1.61 | 208.70 | 66940.00 | 95.58 | 5.02 | 0.76 | 61.21 |
| tj | 2009 | 26.10 | 103.70 | 62574.00 | 98.05 | 1.96 | 0.45 | 90.20 |
| hb | 2009 | 35.28 | 248.60 | 24581.00 | 511.06 | 1.14 | 0.35 | 35.98 |
| sx | 2009 | 25.04 | 157.80 | 21637.00 | 589.84 | 0.68 | 0.39 | 4.93 |
| nmg | 2009 | 168.88 | 155.20 | 39735.00 | 476.99 | 0.25 | 0.38 | 31.80 |
| ln | 2009 | 45.36 | 204.90 | 35325.00 | 456.76 | 2.58 | 0.39 | 154.44 |
| jl | 2009 | 83.22 | 66.10 | 26595.00 | 201.98 | 0.59 | 0.38 | 11.40 |
| hlj | 2009 | 37.04 | 107.80 | 22447.00 | 274.61 | 0.90 | 0.39 | 25.09 |
| sh | 2009 | 10.43 | 160.10 | 69165.00 | 142.48 | 6.22 | 0.59 | 105.38 |
| js | 2009 | 166.26 | 369.90 | 44830.00 | 485.97 | 17.43 | 0.39 | 253.23 |
| zj | 2009 | 405.96 | 198.00 | 43842.00 | 351.97 | 10.85 | 0.43 | 99.40 |
| ah | 2009 | 20.00 | 139.20 | 16408.00 | 273.21 | 1.64 | 0.36 | 38.84 |
| fj | 2009 | 288.41 | 87.20 | 33437.00 | 161.89 | 1.76 | 0.42 | 57.37 |
| jx | 2009 | 85.49 | 70.40 | 17335.00 | 117.13 | 0.52 | 0.34 | 40.24 |
| sd | 2009 | 31.02 | 459.50 | 35894.00 | 879.82 | 6.69 | 0.35 | 80.10 |
| hn | 2009 | 102.85 | 121.30 | 20597.00 | 471.89 | 1.96 | 0.31 | 47.99 |
| hb | 2009 | 1211.99 | 150.60 | 22677.00 | 232.69 | 2.72 | 0.41 | 36.58 |
| hn | 2009 | 409.44 | 146.40 | 20428.00 | 212.12 | 1.59 | 0.42 | 45.98 |
| gd | 2009 | 599.99 | 240.10 | 39418.00 | 394.88 | 12.57 | 0.46 | 195.35 |
| gx | 2009 | 534.94 | 132.30 | 16045.00 | 109.70 | 0.43 | 0.38 | 10.35 |
| hn | 2009 | 15.07 | 19.70 | 19254.00 | 37.79 | 0.10 | 0.46 | 9.38 |
| cq | 2009 | 166.73 | 109.70 | 23346.00 | 136.37 | 1.35 | 0.46 | 33.76 |
| sc | 2009 | 1065.69 | 103.50 | 17339.00 | 271.05 | 3.30 | 0.41 | 35.90 |
| gz | 2009 | 400.87 | 21.20 | 10971.00 | 227.16 | 0.37 | 0.48 | 1.34 |
| yn | 2009 | 622.81 | 79.60 | 13539.00 | 165.45 | 0.46 | 0.41 | 9.10 |
| sx | 2009 | 74.57 | 119.10 | 21947.00 | 262.34 | 1.56 | 0.39 | 15.11 |
| gs | 2009 | 264.20 | 44.40 | 13269.00 | 124.38 | 0.27 | 0.40 | 1.34 |
| qh | 2009 | 276.32 | 12.30 | 19454.00 | 35.46 | 0.05 | 0.37 | 2.15 |
| nx | 2009 | 25.25 | 28.70 | 21777.00 | 140.23 | 0.13 | 0.42 | 1.42 |
| xj | 2009 | 101.25 | 78.20 | 19942.00 | 214.55 | 0.29 | 0.37 | 2.16 |
| bj | 2008 | 0.36 | 152.90 | 64491.00 | 92.26 | 4.35 | 0.76 | 60.82 |
| tj | 2008 | 4.33 | 68.10 | 58656.00 | 92.70 | 1.82 | 0.43 | 74.20 |
| hb | 2008 | 120.15 | 208.30 | 22986.00 | 481.98 | 0.91 | 0.33 | 34.19 |
| sx | 2008 | 28.85 | 140.90 | 21861.00 | 593.75 | 0.54 | 0.37 | 10.23 |
| nmg | 2008 | 111.87 | 135.00 | 34869.00 | 437.68 | 0.22 | 0.33 | 28.56 |
| ln | 2008 | 52.58 | 163.70 | 31918.00 | 436.45 | 2.09 | 0.35 | 120.19 |
| jl | 2008 | 179.04 | 59.60 | 23521.00 | 190.52 | 0.55 | 0.38 | 9.93 |
| hlj | 2008 | 36.34 | 98.80 | 21740.00 | 239.37 | 0.80 | 0.34 | 26.56 |
| sh | 2008 | 8.37 | 153.50 | 66932.00 | 144.42 | 5.28 | 0.56 | 100.84 |
| js | 2008 | 183.69 | 395.90 | 40498.00 | 462.05 | 12.80 | 0.38 | 251.20 |
| zj | 2008 | 385.56 | 519.70 | 41405.00 | 338.75 | 8.99 | 0.41 | 100.73 |
| ah | 2008 | 28.51 | 139.00 | 14448.00 | 240.46 | 1.04 | 0.37 | 34.90 |
| fj | 2008 | 411.30 | 83.10 | 29755.00 | 137.02 | 1.32 | 0.41 | 56.72 |
| jx | 2008 | 168.60 | 39.20 | 15900.00 | 115.47 | 0.37 | 0.34 | 36.04 |
| sd | 2008 | 49.25 | 432.20 | 32936.00 | 831.50 | 6.02 | 0.33 | 82.02 |
| hn | 2008 | 222.86 | 109.90 | 19181.00 | 330.97 | 1.91 | 0.30 | 40.33 |
| hb | 2008 | 1302.81 | 90.10 | 19858.00 | 212.06 | 2.11 | 0.41 | 32.45 |
| hn | 2008 | 407.19 | 91.40 | 18147.00 | 198.20 | 1.40 | 0.40 | 40.05 |
| gd | 2008 | 747.71 | 164.60 | 37543.00 | 356.94 | 10.39 | 0.44 | 191.67 |
| gx | 2008 | 567.27 | 93.00 | 14652.00 | 95.73 | 0.39 | 0.36 | 9.71 |
| hn | 2008 | 12.87 | 12.70 | 17691.00 | 35.58 | 0.09 | 0.43 | 12.83 |
| cq | 2008 | 172.37 | 67.30 | 20865.00 | 119.80 | 0.83 | 0.46 | 24.52 |
| sc | 2008 | 982.12 | 100.70 | 15495.00 | 234.21 | 2.43 | 0.36 | 30.88 |
| gz | 2008 | 394.06 | 23.20 | 9855.00 | 195.37 | 0.29 | 0.41 | 1.74 |
| yn | 2008 | 690.08 | 44.10 | 12570.00 | 150.49 | 0.41 | 0.39 | 7.77 |
| sx | 2008 | 66.42 | 75.50 | 19700.00 | 274.76 | 1.19 | 0.33 | 13.70 |
| gs | 2008 | 218.44 | 31.20 | 12421.00 | 126.46 | 0.22 | 0.39 | 1.28 |
| qh | 2008 | 207.23 | 18.10 | 18421.00 | 32.12 | 0.04 | 0.34 | 2.20 |
| nx | 2008 | 21.89 | 30.90 | 19609.00 | 109.47 | 0.11 | 0.36 | 1.21 |
| xj | 2008 | 84.82 | 47.70 | 19797.00 | 179.22 | 0.24 | 0.34 | 1.90 |
| bj | 2007 | 4.93 | 185.30 | 58204.00 | 80.41 | 3.17 | 0.74 | 50.66 |
| tj | 2007 | 0.14 | 59.80 | 46122.00 | 90.02 | 1.57 | 0.43 | 52.78 |
| hb | 2007 | 13.20 | 170.20 | 19877.00 | 453.98 | 0.79 | 0.34 | 24.16 |
| sx | 2007 | 47.32 | 97.00 | 17917.00 | 238.13 | 0.33 | 0.37 | 13.43 |
| nmg | 2007 | 55.12 | 90.50 | 25393.00 | 328.95 | 0.20 | 0.36 | 23.88 |
| ln | 2007 | 49.77 | 125.10 | 26255.00 | 410.63 | 1.95 | 0.37 | 90.97 |
| jl | 2007 | 72.02 | 50.90 | 19383.00 | 161.91 | 0.53 | 0.38 | 8.85 |
| hlj | 2007 | 14.89 | 58.70 | 18478.00 | 222.50 | 0.72 | 0.35 | 21.69 |
| sh | 2007 | 2.89 | 123.00 | 66367.00 | 131.56 | 4.72 | 0.54 | 79.20 |
| js | 2007 | 97.21 | 318.20 | 34198.00 | 436.35 | 8.90 | 0.37 | 218.92 |
| zj | 2007 | 345.14 | 177.40 | 37411.00 | 326.16 | 6.89 | 0.41 | 103.66 |
| ah | 2007 | 19.67 | 82.40 | 12044.80 | 197.40 | 0.61 | 0.38 | 29.99 |
| fj | 2007 | 314.65 | 78.00 | 25908.00 | 128.67 | 1.13 | 0.41 | 40.61 |
| jx | 2007 | 85.06 | 45.50 | 12633.00 | 107.22 | 0.35 | 0.33 | 31.04 |
| sd | 2007 | 6.60 | 320.80 | 27807.00 | 765.64 | 4.68 | 0.33 | 110.12 |
| hn | 2007 | 88.53 | 114.40 | 16012.00 | 394.89 | 1.49 | 0.31 | 30.62 |
| hb | 2007 | 943.99 | 64.30 | 16206.00 | 210.59 | 1.74 | 0.42 | 27.66 |
| hn | 2007 | 312.56 | 64.60 | 14492.00 | 202.43 | 1.12 | 0.41 | 32.71 |
| gd | 2007 | 544.73 | 153.60 | 33236.00 | 327.45 | 10.24 | 0.44 | 171.26 |
| gx | 2007 | 326.92 | 65.50 | 12555.00 | 89.63 | 0.35 | 0.37 | 6.84 |
| hn | 2007 | 13.21 | 14.90 | 14555.00 | 34.21 | 0.06 | 0.43 | 11.20 |
| cq | 2007 | 83.86 | 63.70 | 16966.00 | 91.48 | 0.67 | 0.43 | 10.29 |
| sc | 2007 | 814.32 | 102.20 | 12893.00 | 207.82 | 1.92 | 0.37 | 14.93 |
| gz | 2007 | 340.61 | 22.40 | 6915.00 | 159.51 | 0.28 | 0.42 | 1.53 |
| yn | 2007 | 430.95 | 29.90 | 10540.00 | 137.41 | 0.31 | 0.39 | 3.95 |
| sx | 2007 | 55.59 | 63.80 | 14607.00 | 234.28 | 0.85 | 0.35 | 11.95 |
| gs | 2007 | 194.48 | 38.10 | 10346.00 | 118.03 | 0.16 | 0.38 | 1.18 |
| qh | 2007 | 207.76 | 10.60 | 14257.00 | 24.98 | 0.04 | 0.36 | 3.10 |
| nx | 2007 | 20.51 | 33.40 | 14649.00 | 98.25 | 0.08 | 0.38 | 1.70 |
| xj | 2007 | 64.42 | 35.20 | 16999.00 | 152.45 | 0.23 | 0.35 | 1.25 |
| bj | 2006 | 7.80 | 165.50 | 50407.00 | 81.28 | 2.66 | 0.72 | 45.52 |
| tj | 2006 | 1.00 | 40.80 | 41022.00 | 90.41 | 1.33 | 0.42 | 41.31 |
| hb | 2006 | 22.12 | 132.20 | 16752.00 | 409.11 | 0.72 | 0.34 | 20.14 |
| sx | 2006 | 23.87 | 63.20 | 14566.00 | 313.86 | 0.28 | 0.38 | 4.72 |
| nmg | 2006 | 16.61 | 104.80 | 20264.00 | 277.98 | 0.19 | 0.38 | 19.69 |
| ln | 2006 | 51.72 | 145.80 | 22112.00 | 417.34 | 1.71 | 0.38 | 59.86 |
| jl | 2006 | 57.44 | 42.30 | 15720.00 | 164.07 | 0.46 | 0.40 | 7.61 |
| hlj | 2006 | 16.95 | 54.20 | 16228.00 | 231.44 | 0.65 | 0.34 | 17.49 |
| sh | 2006 | 0.41 | 94.30 | 57695.00 | 138.35 | 3.60 | 0.52 | 71.07 |
| js | 2006 | 22.94 | 282.70 | 28819.00 | 419.50 | 5.33 | 0.36 | 174.31 |
| zj | 2006 | 362.87 | 140.30 | 31874.00 | 302.18 | 5.30 | 0.40 | 88.89 |
| ah | 2006 | 15.72 | 52.00 | 10026.30 | 188.56 | 0.47 | 0.39 | 13.94 |
| fj | 2006 | 348.45 | 59.80 | 21385.00 | 112.57 | 1.04 | 0.40 | 32.20 |
| jx | 2006 | 95.41 | 37.50 | 10798.00 | 101.18 | 0.32 | 0.33 | 28.07 |
| sd | 2006 | 5.31 | 258.10 | 23794.00 | 745.57 | 3.83 | 0.33 | 100.01 |
| hn | 2006 | 88.15 | 95.10 | 13172.00 | 352.47 | 1.15 | 0.31 | 18.45 |
| hb | 2006 | 758.26 | 67.70 | 13297.00 | 199.68 | 1.46 | 0.42 | 24.49 |
| hn | 2006 | 290.82 | 54.00 | 11950.00 | 184.85 | 1.02 | 0.42 | 25.93 |
| gd | 2006 | 581.53 | 160.40 | 27861.00 | 310.28 | 9.09 | 0.44 | 145.11 |
| gx | 2006 | 243.67 | 41.20 | 10296.00 | 80.97 | 0.28 | 0.39 | 4.47 |
| hn | 2006 | 11.90 | 8.30 | 12403.00 | 14.61 | 0.05 | 0.41 | 7.49 |
| cq | 2006 | 56.43 | 60.10 | 13915.00 | 83.98 | 0.65 | 0.42 | 6.96 |
| sc | 2006 | 784.65 | 71.10 | 10546.00 | 167.75 | 1.31 | 0.38 | 12.08 |
| gz | 2006 | 225.97 | 19.80 | 5759.00 | 167.54 | 0.27 | 0.40 | 1.84 |
| yn | 2006 | 355.72 | 29.00 | 8970.00 | 140.61 | 0.31 | 0.39 | 3.02 |
| sx | 2006 | 39.88 | 41.00 | 12138.00 | 187.38 | 0.57 | 0.35 | 9.25 |
| gs | 2006 | 172.75 | 27.80 | 8757.00 | 110.46 | 0.15 | 0.40 | 0.30 |
| qh | 2006 | 209.58 | 6.10 | 11724.00 | 24.32 | 0.03 | 0.38 | 2.75 |
| nx | 2006 | 21.11 | 21.30 | 11846.66 | 82.42 | 0.07 | 0.40 | 1.38 |
| xj | 2006 | 58.13 | 23.30 | 15000.00 | 148.51 | 0.23 | 0.35 | 1.04 |
| bj | 2005 | 3.55 | 84.90 | 45444.00 | 95.37 | 2.26 | 0.70 | 35.26 |
| tj | 2005 | 3.37 | 71.40 | 35783.00 | 89.59 | 1.17 | 0.42 | 33.29 |
| hb | 2005 | 6.46 | 121.40 | 14782.00 | 408.93 | 0.64 | 0.33 | 19.13 |
| sx | 2005 | 20.32 | 48.50 | 12696.00 | 296.47 | 0.20 | 0.38 | 2.75 |
| nmg | 2005 | 14.31 | 68.00 | 16331.00 | 246.57 | 0.15 | 0.39 | 14.00 |
| ln | 2005 | 59.21 | 129.00 | 19254.00 | 397.89 | 1.57 | 0.40 | 35.90 |
| jl | 2005 | 79.27 | 34.00 | 13348.00 | 146.85 | 0.41 | 0.39 | 6.61 |
| hlj | 2005 | 14.89 | 46.70 | 14434.00 | 228.04 | 0.61 | 0.34 | 15.22 |
| sh | 2005 | 5.23 | 88.10 | 52060.00 | 142.32 | 3.27 | 0.52 | 68.50 |
| js | 2005 | 5.97 | 294.30 | 24842.00 | 386.71 | 3.48 | 0.35 | 131.83 |
| zj | 2005 | 361.78 | 160.30 | 27703.00 | 267.35 | 4.32 | 0.40 | 77.23 |
| ah | 2005 | 12.04 | 49.30 | 8669.50 | 171.64 | 0.35 | 0.40 | 6.88 |
| fj | 2005 | 291.37 | 80.90 | 18646.00 | 99.37 | 0.95 | 0.39 | 26.08 |
| jx | 2005 | 67.88 | 37.10 | 9440.00 | 90.32 | 0.28 | 0.35 | 24.23 |
| sd | 2005 | 1.80 | 238.80 | 20096.00 | 661.84 | 2.88 | 0.32 | 89.71 |
| hn | 2005 | 67.91 | 82.40 | 11346.00 | 343.33 | 0.90 | 0.31 | 12.30 |
| hb | 2005 | 813.65 | 62.00 | 11431.00 | 167.84 | 1.15 | 0.41 | 21.85 |
| hn | 2005 | 241.28 | 37.70 | 10426.00 | 167.21 | 0.88 | 0.44 | 20.72 |
| gd | 2005 | 514.06 | 171.50 | 23997.00 | 272.17 | 7.22 | 0.43 | 123.64 |
| gx | 2005 | 195.81 | 41.40 | 8788.00 | 70.55 | 0.24 | 0.39 | 3.79 |
| hn | 2005 | 9.73 | 6.30 | 10997.86 | 7.55 | 0.05 | 0.41 | 6.84 |
| cq | 2005 | 68.09 | 50.20 | 12335.00 | 73.28 | 0.63 | 0.42 | 5.16 |
| sc | 2005 | 653.35 | 78.30 | 9060.00 | 159.39 | 1.06 | 0.38 | 8.87 |
| gz | 2005 | 213.35 | 14.10 | 5052.00 | 144.13 | 0.22 | 0.40 | 1.96 |
| yn | 2005 | 349.31 | 28.40 | 7835.00 | 124.56 | 0.26 | 0.40 | 1.74 |
| sx | 2005 | 52.95 | 36.50 | 10161.00 | 217.33 | 0.42 | 0.38 | 6.28 |
| gs | 2005 | 166.47 | 20.40 | 7476.53 | 104.51 | 0.18 | 0.41 | 0.20 |
| qh | 2005 | 160.26 | 5.30 | 10045.00 | 21.12 | 0.02 | 0.39 | 2.66 |
| nx | 2005 | 17.68 | 12.10 | 10238.78 | 74.03 | 0.05 | 0.42 | 1.41 |
| xj | 2005 | 44.63 | 33.50 | 13108.00 | 132.44 | 0.19 | 0.36 | 0.47 |
| bj | 2004 | 5.82 | 65.40 | 41099.00 | 77.47 | 1.84 | 0.68 | 30.84 |
| tj | 2004 | 1.00 | 42.70 | 30574.94 | 78.99 | 0.84 | 0.42 | 24.72 |
| hb | 2004 | 4.45 | 91.20 | 12487.30 | 365.68 | 0.56 | 0.33 | 16.23 |
| sx | 2004 | 20.99 | 45.00 | 10741.00 | 322.94 | 0.19 | 0.39 | 0.90 |
| nmg | 2004 | 10.60 | 44.30 | 12766.88 | 210.05 | 0.15 | 0.32 | 8.97 |
| ln | 2004 | 40.37 | 118.90 | 15987.00 | 355.88 | 1.47 | 0.41 | 54.07 |
| jl | 2004 | 57.04 | 35.40 | 11536.94 | 123.66 | 0.37 | 0.31 | 4.53 |
| hlj | 2004 | 16.85 | 61.30 | 12449.00 | 193.17 | 0.49 | 0.29 | 14.45 |
| sh | 2004 | 1.25 | 70.30 | 46338.32 | 133.88 | 2.05 | 0.51 | 65.41 |
| js | 2004 | 4.11 | 205.00 | 20208.00 | 314.20 | 2.35 | 0.35 | 121.38 |
| zj | 2004 | 316.56 | 158.30 | 24351.99 | 231.82 | 2.53 | 0.39 | 66.81 |
| ah | 2004 | 19.52 | 41.30 | 7681.90 | 165.29 | 0.29 | 0.41 | 5.47 |
| fj | 2004 | 185.12 | 52.60 | 16469.00 | 86.71 | 0.75 | 0.39 | 22.21 |
| jx | 2004 | 75.55 | 29.60 | 8097.00 | 83.36 | 0.27 | 0.35 | 20.52 |
| sd | 2004 | 6.41 | 191.90 | 16412.83 | 518.28 | 1.84 | 0.32 | 87.01 |
| hn | 2004 | 79.88 | 61.10 | 9200.59 | 239.26 | 0.63 | 0.32 | 8.74 |
| hb | 2004 | 699.97 | 44.80 | 9897.64 | 169.11 | 0.80 | 0.41 | 20.71 |
| hn | 2004 | 279.80 | 29.00 | 9165.03 | 114.21 | 0.77 | 0.43 | 14.18 |
| gd | 2004 | 479.97 | 112.20 | 20647.00 | 251.32 | 5.22 | 0.44 | 100.12 |
| gx | 2004 | 186.47 | 32.00 | 7461.00 | 67.23 | 0.22 | 0.40 | 2.96 |
| hn | 2004 | 9.30 | 7.20 | 9812.39 | 8.77 | 0.04 | 0.41 | 6.43 |
| cq | 2004 | 93.67 | 48.20 | 10934.00 | 64.42 | 0.52 | 0.41 | 4.05 |
| sc | 2004 | 620.70 | 74.70 | 7895.24 | 169.87 | 0.73 | 0.39 | 7.01 |
| gz | 2004 | 230.06 | 15.40 | 4317.00 | 123.38 | 0.15 | 0.34 | 1.39 |
| yn | 2004 | 299.83 | 22.60 | 7011.65 | 59.66 | 0.21 | 0.35 | 1.42 |
| sx | 2004 | 42.39 | 35.70 | 8587.00 | 116.46 | 0.32 | 0.37 | 5.27 |
| gs | 2004 | 120.63 | 16.50 | 6566.15 | 99.57 | 0.09 | 0.33 | 0.35 |
| qh | 2004 | 111.30 | 6.30 | 8692.65 | 19.62 | 0.01 | 0.39 | 2.25 |
| nx | 2004 | 9.67 | 18.10 | 9198.69 | 61.32 | 0.04 | 0.34 | 1.25 |
| xj | 2004 | 37.50 | 37.80 | 11337.00 | 120.98 | 0.15 | 0.38 | 0.46 |
| bj | 2003 | 6.52 | 64.50 | 34892.00 | 69.37 | 1.70 | 0.69 | 21.47 |
| tj | 2003 | 1.00 | 51.50 | 25544.26 | 71.52 | 0.68 | 0.45 | 16.33 |
| hb | 2003 | 3.17 | 75.80 | 10250.72 | 320.69 | 0.56 | 0.35 | 11.16 |
| sx | 2003 | 19.30 | 32.00 | 8641.00 | 308.85 | 0.17 | 0.41 | 2.20 |
| nmg | 2003 | 8.20 | 28.00 | 10039.01 | 126.36 | 0.14 | 0.35 | 6.65 |
| ln | 2003 | 24.81 | 88.00 | 14270.00 | 319.54 | 1.35 | 0.41 | 55.83 |
| jl | 2003 | 41.44 | 22.40 | 9853.90 | 116.48 | 0.43 | 0.35 | 3.18 |
| hlj | 2003 | 10.66 | 56.10 | 10638.00 | 172.02 | 0.50 | 0.32 | 12.88 |
| sh | 2003 | 0.12 | 79.40 | 39128.32 | 123.98 | 2.24 | 0.51 | 58.50 |
| js | 2003 | 4.00 | 179.40 | 16743.00 | 268.13 | 1.84 | 0.36 | 158.02 |
| zj | 2003 | 274.24 | 139.30 | 20444.06 | 184.04 | 2.15 | 0.40 | 54.49 |
| ah | 2003 | 15.55 | 28.00 | 6375.40 | 150.36 | 0.27 | 0.42 | 3.91 |
| fj | 2003 | 189.24 | 34.90 | 14333.00 | 75.00 | 0.72 | 0.40 | 49.93 |
| jx | 2003 | 47.64 | 21.60 | 6624.00 | 67.83 | 0.24 | 0.37 | 16.12 |
| sd | 2003 | 0.20 | 156.40 | 13267.59 | 424.16 | 1.58 | 0.34 | 70.94 |
| hn | 2003 | 56.84 | 48.10 | 7375.90 | 231.76 | 0.53 | 0.34 | 5.61 |
| hb | 2003 | 385.14 | 31.80 | 8378.01 | 150.52 | 0.66 | 0.42 | 15.57 |
| hn | 2003 | 242.97 | 25.60 | 7588.76 | 104.21 | 0.61 | 0.43 | 14.89 |
| gd | 2003 | 483.22 | 123.60 | 17950.00 | 225.58 | 4.32 | 0.45 | 155.78 |
| gx | 2003 | 192.63 | 27.50 | 6169.00 | 49.71 | 0.23 | 0.42 | 4.56 |
| hn | 2003 | 13.34 | 3.60 | 8591.69 | 8.30 | 0.04 | 0.41 | 5.81 |
| cq | 2003 | 45.93 | 40.10 | 9311.00 | 54.54 | 0.46 | 0.43 | 3.11 |
| sc | 2003 | 480.81 | 59.70 | 6623.44 | 148.67 | 0.74 | 0.41 | 5.82 |
| gz | 2003 | 208.24 | 10.00 | 3701.00 | 111.70 | 0.12 | 0.35 | 1.32 |
| yn | 2003 | 280.89 | 17.10 | 5871.04 | 81.86 | 0.20 | 0.36 | 1.68 |
| sx | 2003 | 45.81 | 30.80 | 7028.00 | 93.61 | 0.34 | 0.39 | 4.66 |
| gs | 2003 | 108.92 | 13.30 | 5429.40 | 90.31 | 0.10 | 0.35 | 0.39 |
| qh | 2003 | 66.60 | 3.70 | 7345.62 | 18.24 | 0.02 | 0.41 | 1.69 |
| nx | 2003 | 7.28 | 16.00 | 7733.77 | 38.08 | 0.04 | 0.36 | 0.72 |
| xj | 2003 | 38.43 | 35.60 | 9828.00 | 102.95 | 0.15 | 0.40 | 0.40 |

| province | year | URB | COAL | ER | PEDU | TRAN |
| --- | --- | --- | --- | --- | --- | --- |
| bj | 2017 | 1312.61 | 0.069 | 0.00294 | 5764.38 | 0.0010239 |
| tj | 2017 | 1308.72 | 0.484 | 0.00103 | 3757.94 | 0.0010619 |
| hb | 2017 | 401.00 | 0.902 | 0.00216 | 2119.61 | 0.0025493 |
| sx | 2017 | 237.25 | 2.141 | 0.00760 | 2304.93 | 0.0038585 |
| nmg | 2017 | 22.13 | 1.938 | 0.00658 | 3006.14 | 0.0078867 |
| ln | 2017 | 294.41 | 0.816 | 0.00142 | 2209.23 | 0.0027861 |
| jl | 2017 | 141.48 | 1.167 | 0.00130 | 2423.87 | 0.0038233 |
| hlj | 2017 | 83.35 | 1.154 | 0.00225 | 1991.56 | 0.0043812 |
| sh | 2017 | 2941.75 | 0.386 | 0.00480 | 5005.34 | 0.0005509 |
| js | 2017 | 754.26 | 0.847 | 0.00116 | 3233.24 | 0.0019737 |
| zj | 2017 | 544.31 | 0.678 | 0.00166 | 3770.17 | 0.0021231 |
| ah | 2017 | 451.30 | 1.232 | 0.00202 | 2198.56 | 0.0032501 |
| fj | 2017 | 317.77 | 0.585 | 0.00096 | 2912.55 | 0.0027617 |
| jx | 2017 | 278.51 | 0.863 | 0.00111 | 2535.20 | 0.0035111 |
| sd | 2017 | 639.41 | 0.987 | 0.00343 | 2393.21 | 0.0027043 |
| hn | 2017 | 580.22 | 0.988 | 0.00239 | 2254.05 | 0.0028016 |
| hb | 2017 | 318.31 | 0.687 | 0.00113 | 2341.89 | 0.0045660 |
| hn | 2017 | 325.65 | 0.767 | 0.00061 | 2210.69 | 0.0034944 |
| gd | 2017 | 631.00 | 0.531 | 0.00111 | 3456.92 | 0.0019660 |
| gx | 2017 | 207.36 | 0.632 | 0.00102 | 2434.35 | 0.0025232 |
| hn | 2017 | 264.21 | 0.523 | 0.00344 | 3662.15 | 0.0033145 |
| cq | 2017 | 377.05 | 0.592 | 0.00071 | 3083.91 | 0.0048089 |
| sc | 2017 | 172.31 | 0.376 | 0.00089 | 2321.67 | 0.0039743 |
| gz | 2017 | 204.37 | 1.279 | 0.00098 | 3488.27 | 0.0054296 |
| yn | 2017 | 126.05 | 0.650 | 0.00096 | 2768.90 | 0.0050525 |
| sx | 2017 | 2.86 | 1.601 | 0.00158 | 2749.58 | 0.0045469 |
| gs | 2017 | 187.76 | 0.844 | 0.00293 | 2845.32 | 0.0054177 |
| qh | 2017 | 65.26 | 0.416 | 0.00131 | 3916.36 | 0.0135190 |
| nx | 2017 | 8.40 | 1.704 | 0.00541 | 3356.47 | 0.0050692 |
| xj | 2017 | 132.44 | 1.171 | 0.00311 | 3466.45 | 0.0075813 |
| bj | 2016 | 14.94 | 0.122 | 0.00200 | 5492.53 | 0.0010136 |
| tj | 2016 | 1322.79 | 0.513 | 0.00137 | 3434.52 | 0.0010732 |
| hb | 2016 | 1306.21 | 0.943 | 0.00163 | 1901.44 | 0.0025225 |
| sx | 2016 | 399.06 | 1.836 | 0.00598 | 2157.24 | 0.0038588 |
| nmg | 2016 | 236.23 | 1.885 | 0.00475 | 3025.72 | 0.0077802 |
| ln | 2016 | 22.09 | 0.806 | 0.00225 | 2102.99 | 0.0027339 |
| jl | 2016 | 295.08 | 1.175 | 0.00140 | 2356.30 | 0.0037498 |
| hlj | 2016 | 142.16 | 1.143 | 0.00395 | 1931.08 | 0.0043299 |
| sh | 2016 | 83.70 | 0.395 | 0.00618 | 4636.50 | 0.0005493 |
| js | 2016 | 2934.47 | 0.903 | 0.00216 | 3003.13 | 0.0019666 |
| zj | 2016 | 752.23 | 0.688 | 0.00284 | 3382.49 | 0.0021297 |
| ah | 2016 | 536.72 | 1.239 | 0.00351 | 1993.53 | 0.0031892 |
| fj | 2016 | 446.37 | 0.552 | 0.00161 | 2703.66 | 0.0027557 |
| jx | 2016 | 315.35 | 0.871 | 0.00118 | 2279.67 | 0.0035257 |
| sd | 2016 | 276.95 | 1.057 | 0.00403 | 2254.33 | 0.0026715 |
| hn | 2016 | 636.79 | 1.005 | 0.00338 | 1983.07 | 0.0028057 |
| hb | 2016 | 577.44 | 0.694 | 0.00252 | 2210.58 | 0.0044211 |
| hn | 2016 | 317.50 | 0.724 | 0.00095 | 2020.22 | 0.0034927 |
| gd | 2016 | 323.82 | 0.516 | 0.00075 | 3061.68 | 0.0019828 |
| gx | 2016 | 621.16 | 0.646 | 0.00158 | 2255.94 | 0.0024917 |
| hn | 2016 | 205.63 | 0.506 | 0.00178 | 3346.05 | 0.0030767 |
| cq | 2016 | 261.95 | 0.617 | 0.00047 | 2907.47 | 0.0046883 |
| sc | 2016 | 373.77 | 0.436 | 0.00086 | 2132.77 | 0.0039232 |
| gz | 2016 | 171.51 | 1.334 | 0.00122 | 2907.27 | 0.0053903 |
| yn | 2016 | 203.24 | 0.700 | 0.00223 | 2491.66 | 0.0049901 |
| sx | 2016 | 125.29 | 1.623 | 0.00205 | 2635.75 | 0.0045237 |
| gs | 2016 | 2.80 | 0.870 | 0.00436 | 2711.05 | 0.0054417 |
| qh | 2016 | 186.36 | 0.477 | 0.00770 | 3644.68 | 0.0132418 |
| nx | 2016 | 64.99 | 1.550 | 0.01627 | 3070.91 | 0.0050289 |
| xj | 2016 | 8.33 | 1.165 | 0.00401 | 3267.54 | 0.0075929 |
| bj | 2015 | 131.28 | 0.170 | 0.00220 | 5146.86 | 0.0010083 |
| tj | 2015 | 14.69 | 0.549 | 0.00312 | 3623.73 | 0.0010698 |
| hb | 2015 | 1324.19 | 0.985 | 0.00376 | 1732.23 | 0.0024856 |
| sx | 2015 | 1310.40 | 1.915 | 0.00537 | 2304.06 | 0.0038470 |
| nmg | 2015 | 396.43 | 1.928 | 0.00488 | 2816.41 | 0.0069841 |
| ln | 2015 | 234.96 | 0.800 | 0.00146 | 2003.92 | 0.0027239 |
| jl | 2015 | 22.01 | 1.204 | 0.00173 | 2170.19 | 0.0035349 |
| hlj | 2015 | 295.69 | 1.108 | 0.00403 | 1846.81 | 0.0042821 |
| sh | 2015 | 143.00 | 0.415 | 0.00265 | 4194.63 | 0.0005463 |
| js | 2015 | 83.93 | 0.900 | 0.00194 | 2816.31 | 0.0019910 |
| zj | 2015 | 2936.89 | 0.705 | 0.00297 | 3171.73 | 0.0021306 |
| ah | 2015 | 749.39 | 1.271 | 0.00164 | 1884.64 | 0.0030428 |
| fj | 2015 | 530.36 | 0.629 | 0.00342 | 2612.22 | 0.0027243 |
| jx | 2015 | 442.16 | 0.912 | 0.00176 | 2131.77 | 0.0034305 |
| sd | 2015 | 312.37 | 1.079 | 0.00321 | 2095.25 | 0.0026754 |
| hn | 2015 | 275.15 | 1.024 | 0.00184 | 1836.61 | 0.0026433 |
| hb | 2015 | 633.04 | 0.717 | 0.00117 | 1954.21 | 0.0043233 |
| hn | 2015 | 575.81 | 0.720 | 0.00204 | 1802.03 | 0.0034923 |
| gd | 2015 | 316.59 | 0.550 | 0.00106 | 2809.01 | 0.0019912 |
| gx | 2015 | 322.02 | 0.619 | 0.00320 | 2108.33 | 0.0024602 |
| hn | 2015 | 611.70 | 0.553 | 0.00150 | 3085.09 | 0.0029490 |
| cq | 2015 | 203.65 | 0.677 | 0.00085 | 2642.42 | 0.0046593 |
| sc | 2015 | 259.41 | 0.467 | 0.00089 | 2000.19 | 0.0038467 |
| gz | 2015 | 370.49 | 1.290 | 0.00258 | 2628.52 | 0.0052814 |
| yn | 2015 | 170.68 | 0.745 | 0.00399 | 2204.94 | 0.0049772 |
| sx | 2015 | 201.82 | 1.568 | 0.00308 | 2550.69 | 0.0044839 |
| gs | 2015 | 124.51 | 0.872 | 0.00162 | 2491.98 | 0.0053875 |
| qh | 2015 | 2.75 | 0.365 | 0.00409 | 3523.79 | 0.0128466 |
| nx | 2015 | 185.29 | 1.648 | 0.00756 | 2939.55 | 0.0049770 |
| xj | 2015 | 64.59 | 1.109 | 0.00440 | 3026.83 | 0.0075544 |
| bj | 2014 | 8.27 | 0.254 | 0.00167 | 5083.37 | 0.0010155 |
| tj | 2014 | 129.93 | 0.617 | 0.00286 | 4170.77 | 0.0010621 |
| hb | 2014 | 14.40 | 1.011 | 0.00593 | 1471.02 | 0.0024270 |
| sx | 2014 | 1322.67 | 1.892 | 0.00495 | 1928.81 | 0.0038497 |
| nmg | 2014 | 1297.78 | 1.992 | 0.00850 | 2552.60 | 0.0068735 |
| ln | 2014 | 394.04 | 0.826 | 0.00266 | 1981.45 | 0.0026077 |
| jl | 2014 | 233.82 | 1.213 | 0.00225 | 1944.93 | 0.0034894 |
| hlj | 2014 | 21.93 | 1.137 | 0.00320 | 1638.09 | 0.0042386 |
| sh | 2014 | 295.99 | 0.442 | 0.00218 | 4078.12 | 0.0005337 |
| js | 2014 | 144.06 | 0.901 | 0.00157 | 2613.16 | 0.0019789 |
| zj | 2014 | 84.21 | 0.734 | 0.00353 | 2919.35 | 0.0021127 |
| ah | 2014 | 2931.15 | 1.314 | 0.00159 | 1718.09 | 0.0028666 |
| fj | 2014 | 747.26 | 0.677 | 0.00339 | 2345.97 | 0.0026587 |
| jx | 2014 | 525.52 | 0.928 | 0.00150 | 1966.05 | 0.0034238 |
| sd | 2014 | 438.42 | 1.084 | 0.00492 | 1925.32 | 0.0026510 |
| hn | 2014 | 309.55 | 1.059 | 0.00311 | 1743.23 | 0.0026479 |
| hb | 2014 | 273.57 | 0.728 | 0.00205 | 1697.82 | 0.0040738 |
| hn | 2014 | 626.69 | 0.712 | 0.00139 | 1675.09 | 0.0035066 |
| gd | 2014 | 572.67 | 0.575 | 0.00121 | 2550.97 | 0.0019778 |
| gx | 2014 | 314.78 | 0.714 | 0.00244 | 1806.11 | 0.0024169 |
| hn | 2014 | 320.18 | 0.560 | 0.00641 | 2671.78 | 0.0028780 |
| cq | 2014 | 603.36 | 0.709 | 0.00077 | 2333.35 | 0.0042586 |
| sc | 2014 | 201.89 | 0.556 | 0.00166 | 1782.32 | 0.0038051 |
| gz | 2014 | 257.66 | 1.351 | 0.00479 | 2194.98 | 0.0051048 |
| yn | 2014 | 366.66 | 0.830 | 0.00462 | 1951.55 | 0.0048876 |
| sx | 2014 | 169.48 | 1.637 | 0.00349 | 2410.96 | 0.0044275 |
| gs | 2014 | 200.37 | 0.893 | 0.00602 | 2123.23 | 0.0053298 |
| qh | 2014 | 123.75 | 0.455 | 0.00604 | 3388.44 | 0.0124615 |
| nx | 2014 | 2.70 | 1.791 | 0.02035 | 2566.69 | 0.0047278 |
| xj | 2014 | 184.31 | 1.078 | 0.00802 | 2768.62 | 0.0076341 |
| bj | 2013 | 64.33 | 0.300 | 0.00098 | 4727.81 | 0.0010248 |
| tj | 2013 | 8.20 | 0.670 | 0.00204 | 3871.47 | 0.0010676 |
| hb | 2013 | 128.56 | 1.067 | 0.00347 | 1404.43 | 0.0023797 |
| sx | 2013 | 14.17 | 1.854 | 0.00818 | 1905.96 | 0.0038414 |
| nmg | 2013 | 1311.15 | 1.975 | 0.00690 | 2450.97 | 0.0067070 |
| ln | 2013 | 1272.49 | 0.835 | 0.00194 | 2118.92 | 0.0025073 |
| jl | 2013 | 391.86 | 1.205 | 0.00137 | 1991.93 | 0.0034245 |
| hlj | 2013 | 232.78 | 1.119 | 0.00350 | 1566.17 | 0.0041775 |
| sh | 2013 | 21.87 | 0.501 | 0.00065 | 3755.34 | 0.0005231 |
| js | 2013 | 296.57 | 0.957 | 0.00204 | 2501.78 | 0.0019660 |
| zj | 2013 | 144.01 | 0.760 | 0.00313 | 2635.58 | 0.0020994 |
| ah | 2013 | 84.68 | 1.339 | 0.00397 | 1708.39 | 0.0028817 |
| fj | 2013 | 2943.79 | 0.722 | 0.00339 | 2180.18 | 0.0026374 |
| jx | 2013 | 745.74 | 0.957 | 0.00202 | 1832.09 | 0.0033627 |
| sd | 2013 | 522.58 | 1.066 | 0.00308 | 1828.36 | 0.0025971 |
| hn | 2013 | 434.09 | 1.144 | 0.00247 | 1654.79 | 0.0026540 |
| hb | 2013 | 306.89 | 0.775 | 0.00207 | 1547.21 | 0.0039130 |
| hn | 2013 | 272.16 | 0.752 | 0.00203 | 1611.90 | 0.0035183 |
| gd | 2013 | 623.01 | 0.601 | 0.00110 | 2327.65 | 0.0019064 |
| gx | 2013 | 570.01 | 0.807 | 0.00267 | 1651.66 | 0.0023603 |
| hn | 2013 | 312.87 | 0.587 | 0.00403 | 2482.87 | 0.0027759 |
| cq | 2013 | 318.02 | 0.720 | 0.00123 | 2210.65 | 0.0041362 |
| sc | 2013 | 596.41 | 0.608 | 0.00139 | 1702.91 | 0.0037229 |
| gz | 2013 | 200.12 | 1.468 | 0.00603 | 1941.57 | 0.0049273 |
| yn | 2013 | 255.58 | 0.971 | 0.00485 | 1921.84 | 0.0047570 |
| sx | 2013 | 363.61 | 1.626 | 0.00469 | 2371.85 | 0.0043906 |
| gs | 2013 | 168.17 | 0.898 | 0.00646 | 1977.23 | 0.0051738 |
| qh | 2013 | 199.15 | 0.550 | 0.00253 | 2716.22 | 0.0121354 |
| nx | 2013 | 123.02 | 1.785 | 0.01308 | 2413.56 | 0.0043648 |
| xj | 2013 | 2.64 | 1.042 | 0.00584 | 2661.46 | 0.0075147 |
| bj | 2012 | 183.45 | 0.316 | 0.00081 | 4231.73 | 0.0010386 |
| tj | 2012 | 64.11 | 0.645 | 0.00188 | 3311.68 | 0.0010891 |
| hb | 2012 | 8.13 | 1.037 | 0.00169 | 1477.94 | 0.0022373 |
| sx | 2012 | 127.34 | 1.787 | 0.00480 | 1793.42 | 0.0038155 |
| nmg | 2012 | 13.81 | 1.851 | 0.00216 | 2198.72 | 0.0065772 |
| ln | 2012 | 1288.73 | 0.774 | 0.00090 | 1982.36 | 0.0023850 |
| jl | 2012 | 1235.08 | 1.174 | 0.00090 | 1802.27 | 0.0033889 |
| hlj | 2012 | 389.14 | 1.095 | 0.00065 | 1494.70 | 0.0041487 |
| sh | 2012 | 231.63 | 0.502 | 0.00148 | 3750.39 | 0.0005268 |
| js | 2012 | 21.81 | 0.962 | 0.00144 | 2428.86 | 0.0019459 |
| zj | 2012 | 296.50 | 0.795 | 0.00163 | 2803.66 | 0.0020732 |
| ah | 2012 | 143.96 | 1.295 | 0.00135 | 1649.33 | 0.0027581 |
| fj | 2012 | 84.72 | 0.759 | 0.00233 | 2067.17 | 0.0025256 |
| jx | 2012 | 2931.01 | 0.940 | 0.00057 | 1740.45 | 0.0033436 |
| sd | 2012 | 743.82 | 1.034 | 0.00261 | 1701.51 | 0.0025254 |
| hn | 2012 | 521.63 | 1.067 | 0.00089 | 1567.39 | 0.0026541 |
| hb | 2012 | 430.30 | 0.894 | 0.00133 | 1506.64 | 0.0037749 |
| hn | 2012 | 304.31 | 0.722 | 0.00171 | 1548.56 | 0.0035254 |
| gd | 2012 | 270.97 | 0.605 | 0.00101 | 2374.53 | 0.0018401 |
| gx | 2012 | 619.45 | 0.793 | 0.00137 | 1563.43 | 0.0023047 |
| hn | 2012 | 568.65 | 0.552 | 0.00600 | 2414.25 | 0.0027370 |
| cq | 2012 | 311.96 | 0.728 | 0.00064 | 2087.37 | 0.0040994 |
| sc | 2012 | 315.82 | 0.577 | 0.00090 | 1584.00 | 0.0036341 |
| gz | 2012 | 591.96 | 1.349 | 0.00466 | 1943.86 | 0.0047227 |
| yn | 2012 | 198.64 | 0.944 | 0.00446 | 1768.92 | 0.0047017 |
| sx | 2012 | 253.26 | 1.484 | 0.00336 | 2052.36 | 0.0043007 |
| gs | 2012 | 361.01 | 0.936 | 0.00811 | 1878.33 | 0.0050901 |
| qh | 2012 | 167.48 | 0.528 | 0.00200 | 2795.38 | 0.0115128 |
| nx | 2012 | 198.82 | 1.766 | 0.00597 | 2449.62 | 0.0040980 |
| xj | 2012 | 122.30 | 1.017 | 0.00227 | 2414.05 | 0.0074306 |
| bj | 2011 | 2.60 | 0.338 | 0.00029 | 3652.95 | 0.0010575 |
| tj | 2011 | 182.90 | 0.693 | 0.00258 | 3053.42 | 0.0011194 |
| hb | 2011 | 63.90 | 1.044 | 0.00185 | 1166.75 | 0.0021679 |
| sx | 2011 | 8.05 | 1.828 | 0.00421 | 1529.22 | 0.0037517 |
| nmg | 2011 | 125.93 | 1.851 | 0.00386 | 2030.86 | 0.0064873 |
| ln | 2011 | 13.60 | 0.795 | 0.00095 | 1781.75 | 0.0023734 |
| jl | 2011 | 1261.00 | 1.212 | 0.00117 | 1561.74 | 0.0033372 |
| hlj | 2011 | 1185.53 | 1.089 | 0.00169 | 1261.91 | 0.0040582 |
| sh | 2011 | 386.75 | 0.545 | 0.00080 | 3027.21 | 0.0005148 |
| js | 2011 | 230.41 | 0.992 | 0.00123 | 2010.70 | 0.0019275 |
| zj | 2011 | 21.74 | 0.829 | 0.00108 | 2209.24 | 0.0020461 |
| ah | 2011 | 296.43 | 1.336 | 0.00112 | 1455.01 | 0.0025057 |
| fj | 2011 | 143.91 | 0.818 | 0.00157 | 1705.60 | 0.0024818 |
| jx | 2011 | 84.70 | 1.009 | 0.00104 | 1405.36 | 0.0032666 |
| sd | 2011 | 2888.87 | 1.048 | 0.00260 | 1424.46 | 0.0024197 |
| hn | 2011 | 741.99 | 1.230 | 0.00139 | 1262.92 | 0.0026372 |
| hb | 2011 | 519.64 | 0.953 | 0.00095 | 1188.61 | 0.0036948 |
| hn | 2011 | 427.32 | 0.805 | 0.00104 | 1211.05 | 0.0035204 |
| gd | 2011 | 302.21 | 0.647 | 0.00063 | 1794.06 | 0.0018156 |
| gx | 2011 | 269.87 | 0.819 | 0.00152 | 1278.47 | 0.0022581 |
| hn | 2011 | 616.36 | 0.509 | 0.00385 | 1974.33 | 0.0026119 |
| cq | 2011 | 568.21 | 0.818 | 0.00089 | 1726.46 | 0.0040617 |
| sc | 2011 | 310.88 | 0.582 | 0.00151 | 1272.56 | 0.0035189 |
| gz | 2011 | 313.38 | 1.333 | 0.00601 | 1300.24 | 0.0045494 |
| yn | 2011 | 589.18 | 1.013 | 0.00363 | 1421.48 | 0.0046323 |
| sx | 2011 | 197.09 | 1.364 | 0.00342 | 1827.16 | 0.0040610 |
| gs | 2011 | 250.79 | 0.970 | 0.00443 | 1531.32 | 0.0048240 |
| qh | 2011 | 357.97 | 0.473 | 0.00286 | 2732.39 | 0.0113135 |
| nx | 2011 | 166.84 | 1.841 | 0.00367 | 2054.66 | 0.0038323 |
| xj | 2011 | 197.79 | 0.982 | 0.00329 | 2095.65 | 0.0070245 |
| bj | 2010 | 121.58 | 0.379 | 0.00057 | 3126.79 | 0.0010762 |
| tj | 2010 | 2.56 | 0.705 | 0.00340 | 2248.13 | 0.0011415 |
| hb | 2010 | 182.37 | 0.998 | 0.00101 | 999.88 | 0.0021456 |
| sx | 2010 | 63.79 | 1.777 | 0.00534 | 1261.35 | 0.0036833 |
| nmg | 2010 | 7.99 | 1.605 | 0.00208 | 1676.14 | 0.0063909 |
| ln | 2010 | 124.58 | 0.807 | 0.00148 | 1426.88 | 0.0023210 |
| jl | 2010 | 13.41 | 1.155 | 0.00141 | 1254.50 | 0.0032927 |
| hlj | 2010 | 1230.10 | 1.088 | 0.00098 | 1056.13 | 0.0039637 |
| sh | 2010 | 1136.39 | 0.525 | 0.00130 | 2424.47 | 0.0005200 |
| js | 2010 | 384.25 | 0.896 | 0.00085 | 1670.56 | 0.0019100 |
| zj | 2010 | 229.29 | 0.827 | 0.00084 | 1950.92 | 0.0020229 |
| ah | 2010 | 21.67 | 1.378 | 0.00091 | 1053.38 | 0.0025078 |
| fj | 2010 | 296.03 | 0.716 | 0.00204 | 1446.28 | 0.0024645 |
| jx | 2010 | 143.86 | 0.983 | 0.00124 | 1007.25 | 0.0031508 |
| sd | 2010 | 84.70 | 1.072 | 0.00215 | 1085.28 | 0.0023996 |
| hn | 2010 | 2848.86 | 1.215 | 0.00095 | 966.32 | 0.0026058 |
| hb | 2010 | 740.00 | 0.890 | 0.00357 | 1025.40 | 0.0036027 |
| hn | 2010 | 518.31 | 0.761 | 0.00188 | 988.97 | 0.0034702 |
| gd | 2010 | 425.89 | 0.594 | 0.00135 | 1468.00 | 0.0018211 |
| gx | 2010 | 299.95 | 0.784 | 0.00206 | 1071.89 | 0.0022079 |
| hn | 2010 | 268.95 | 0.476 | 0.00076 | 1637.99 | 0.0024450 |
| cq | 2010 | 613.33 | 0.814 | 0.00178 | 1410.39 | 0.0040542 |
| sc | 2010 | 567.13 | 0.644 | 0.00083 | 1113.15 | 0.0033087 |
| gz | 2010 | 309.75 | 1.334 | 0.00378 | 1054.77 | 0.0043588 |
| yn | 2010 | 311.33 | 1.078 | 0.00330 | 1159.67 | 0.0045469 |
| sx | 2010 | 584.23 | 1.310 | 0.00618 | 1377.06 | 0.0039478 |
| gs | 2010 | 195.53 | 0.910 | 0.00738 | 1280.04 | 0.0046437 |
| qh | 2010 | 248.20 | 0.495 | 0.00131 | 1885.12 | 0.0110361 |
| nx | 2010 | 354.81 | 1.566 | 0.00494 | 1571.47 | 0.0035576 |
| xj | 2010 | 166.30 | 0.978 | 0.00258 | 1691.60 | 0.0070061 |
| bj | 2009 | 196.93 | 0.406 | 0.00121 | 2843.78 | 0.0011159 |
| tj | 2009 | 120.85 | 0.701 | 0.00452 | 1939.22 | 0.0011656 |
| hb | 2009 | 2.52 | 1.043 | 0.00148 | 873.60 | 0.0021627 |
| sx | 2009 | 181.88 | 1.782 | 0.00968 | 1111.38 | 0.0037151 |
| nmg | 2009 | 63.46 | 1.567 | 0.00349 | 1296.76 | 0.0061327 |
| ln | 2009 | 7.92 | 0.839 | 0.00249 | 1232.25 | 0.0023293 |
| jl | 2009 | 123.09 | 1.116 | 0.00224 | 1097.62 | 0.0032279 |
| hlj | 2009 | 13.27 | 1.056 | 0.00245 | 911.18 | 0.0039590 |
| sh | 2009 | 1195.55 | 0.512 | 0.00114 | 2233.81 | 0.0005280 |
| js | 2009 | 1090.01 | 0.886 | 0.00146 | 1415.43 | 0.0018412 |
| zj | 2009 | 381.77 | 0.853 | 0.00163 | 1689.23 | 0.0020273 |
| ah | 2009 | 228.07 | 1.424 | 0.00221 | 837.72 | 0.0024333 |
| fj | 2009 | 21.59 | 0.797 | 0.00214 | 1221.80 | 0.0024415 |
| jx | 2009 | 295.49 | 0.921 | 0.00101 | 852.07 | 0.0030913 |
| sd | 2009 | 143.71 | 1.073 | 0.00273 | 886.71 | 0.0023937 |
| hn | 2009 | 84.69 | 1.238 | 0.00140 | 804.63 | 0.0025542 |
| hb | 2009 | 2794.49 | 0.810 | 0.00466 | 908.13 | 0.0034475 |
| hn | 2009 | 737.24 | 0.806 | 0.00235 | 883.65 | 0.0029879 |
| gd | 2009 | 516.75 | 0.554 | 0.00117 | 1267.80 | 0.0018258 |
| gx | 2009 | 425.08 | 0.735 | 0.00346 | 797.62 | 0.0020694 |
| hn | 2009 | 297.77 | 0.436 | 0.00080 | 1360.39 | 0.0023194 |
| cq | 2009 | 267.38 | 0.822 | 0.00205 | 1157.74 | 0.0038807 |
| sc | 2009 | 610.19 | 0.744 | 0.00143 | 988.21 | 0.0030442 |
| gz | 2009 | 568.17 | 1.442 | 0.00606 | 874.78 | 0.0040306 |
| yn | 2009 | 308.13 | 1.106 | 0.00367 | 964.36 | 0.0045073 |
| sx | 2009 | 310.13 | 1.181 | 0.00486 | 1244.40 | 0.0038670 |
| gs | 2009 | 580.67 | 0.817 | 0.00807 | 1157.61 | 0.0044620 |
| qh | 2009 | 194.06 | 0.558 | 0.00512 | 1410.05 | 0.0107906 |
| nx | 2009 | 245.70 | 1.411 | 0.00656 | 1300.49 | 0.0034877 |
| xj | 2009 | 350.63 | 0.986 | 0.00744 | 1382.72 | 0.0069805 |
| bj | 2008 | 166.20 | 0.434 | 0.00299 | 2648.32 | 0.0011485 |
| tj | 2008 | 197.50 | 0.741 | 0.00454 | 1752.42 | 0.0010254 |
| hb | 2008 | 120.09 | 1.004 | 0.00236 | 799.12 | 0.0021392 |
| sx | 2008 | 2.50 | 1.810 | 0.01248 | 975.89 | 0.0036583 |
| nmg | 2008 | 181.50 | 1.577 | 0.00501 | 1074.13 | 0.0060257 |
| ln | 2008 | 63.35 | 0.862 | 0.00282 | 1110.62 | 0.0023440 |
| jl | 2008 | 7.85 | 1.159 | 0.00303 | 992.68 | 0.0031855 |
| hlj | 2008 | 121.84 | 1.123 | 0.00220 | 885.37 | 0.0039437 |
| sh | 2008 | 13.12 | 0.535 | 0.00171 | 2253.07 | 0.0005371 |
| js | 2008 | 1133.46 | 0.933 | 0.00234 | 1283.65 | 0.0018155 |
| zj | 2008 | 1030.34 | 0.863 | 0.00128 | 1529.59 | 0.0019886 |
| ah | 2008 | 373.32 | 1.367 | 0.00275 | 748.82 | 0.0024259 |
| fj | 2008 | 218.71 | 0.799 | 0.00293 | 1071.32 | 0.0024349 |
| jx | 2008 | 21.47 | 0.978 | 0.00143 | 757.52 | 0.0030419 |
| sd | 2008 | 293.19 | 1.125 | 0.00480 | 822.87 | 0.0023434 |
| hn | 2008 | 143.34 | 1.258 | 0.00240 | 695.89 | 0.0025522 |
| hb | 2008 | 84.52 | 0.794 | 0.00318 | 791.38 | 0.0032983 |
| hn | 2008 | 2682.38 | 0.823 | 0.00286 | 794.05 | 0.0028929 |
| gd | 2008 | 731.71 | 0.566 | 0.00218 | 1178.71 | 0.0018513 |
| gx | 2008 | 500.52 | 0.720 | 0.00493 | 721.81 | 0.0020613 |
| hn | 2008 | 437.52 | 0.416 | 0.00089 | 1087.57 | 0.0021732 |
| cq | 2008 | 295.60 | 0.815 | 0.00319 | 937.86 | 0.0038264 |
| sc | 2008 | 265.57 | 0.708 | 0.00333 | 808.35 | 0.0027584 |
| gz | 2008 | 602.70 | 1.374 | 0.00745 | 753.38 | 0.0034862 |
| yn | 2008 | 573.10 | 1.054 | 0.00419 | 753.45 | 0.0044850 |
| sx | 2008 | 307.71 | 1.205 | 0.00276 | 1023.82 | 0.0035248 |
| gs | 2008 | 302.38 | 0.876 | 0.00806 | 968.05 | 0.0041412 |
| qh | 2008 | 563.38 | 0.577 | 0.00200 | 1096.94 | 0.0102187 |
| nx | 2008 | 204.41 | 1.328 | 0.01486 | 1137.48 | 0.0034010 |
| xj | 2008 | 244.43 | 0.808 | 0.00429 | 1182.99 | 0.0068825 |
| bj | 2007 | 347.51 | 0.475 | 0.00324 | 2432.75 | 0.0012383 |
| tj | 2007 | 169.09 | 0.794 | 0.00520 | 1486.20 | 0.0010342 |
| hb | 2007 | 200.79 | 1.046 | 0.00299 | 634.25 | 0.0021210 |
| sx | 2007 | 119.29 | 1.900 | 0.01324 | 781.08 | 0.0035333 |
| nmg | 2007 | 2.46 | 1.456 | 0.00524 | 831.67 | 0.0057069 |
| ln | 2007 | 181.11 | 0.889 | 0.00427 | 959.16 | 0.0022825 |
| jl | 2007 | 63.23 | 1.115 | 0.00324 | 781.40 | 0.0031300 |
| hlj | 2007 | 7.77 | 1.051 | 0.00276 | 715.64 | 0.0036849 |
| sh | 2007 | 120.35 | 0.540 | 0.00295 | 2092.64 | 0.0005410 |
| js | 2007 | 12.97 | 0.966 | 0.00371 | 1102.32 | 0.0017316 |
| zj | 2007 | 1079.22 | 0.897 | 0.00211 | 1369.29 | 0.0019363 |
| ah | 2007 | 986.58 | 1.262 | 0.00338 | 600.07 | 0.0024252 |
| fj | 2007 | 370.90 | 0.806 | 0.00308 | 919.78 | 0.0024066 |
| jx | 2007 | 217.64 | 1.023 | 0.00278 | 652.42 | 0.0029917 |
| sd | 2007 | 21.35 | 1.121 | 0.00460 | 726.21 | 0.0022658 |
| hn | 2007 | 291.44 | 1.299 | 0.00408 | 587.40 | 0.0025500 |
| hb | 2007 | 143.06 | 0.889 | 0.00455 | 647.31 | 0.0032248 |
| hn | 2007 | 84.50 | 0.884 | 0.00336 | 660.32 | 0.0027603 |
| gd | 2007 | 2597.87 | 0.559 | 0.00289 | 1111.31 | 0.0018842 |
| gx | 2007 | 727.23 | 0.779 | 0.00750 | 578.63 | 0.0019757 |
| hn | 2007 | 494.54 | 0.403 | 0.00107 | 896.99 | 0.0021051 |
| cq | 2007 | 437.81 | 0.859 | 0.00422 | 820.22 | 0.0037182 |
| sc | 2007 | 293.42 | 0.717 | 0.00432 | 616.44 | 0.0023304 |
| gz | 2007 | 263.65 | 1.408 | 0.00406 | 569.97 | 0.0033934 |
| yn | 2007 | 599.33 | 1.068 | 0.00424 | 610.88 | 0.0044380 |
| sx | 2007 | 569.59 | 1.193 | 0.00325 | 769.95 | 0.0032709 |
| gs | 2007 | 307.22 | 0.875 | 0.01165 | 698.18 | 0.0039484 |
| qh | 2007 | 301.16 | 0.616 | 0.00189 | 830.74 | 0.0095406 |
| nx | 2007 | 550.22 | 1.329 | 0.01017 | 1043.79 | 0.0033694 |
| xj | 2007 | 202.73 | 0.752 | 0.00405 | 920.77 | 0.0069311 |
| bj | 2006 | 241.64 | 0.518 | 0.00463 | 2107.64 | 0.0012806 |
| tj | 2006 | 345.08 | 0.842 | 0.00609 | 1329.29 | 0.0010527 |
| hb | 2006 | 168.12 | 0.984 | 0.00312 | 515.28 | 0.0020843 |
| sx | 2006 | 204.14 | 2.101 | 0.01334 | 651.49 | 0.0033465 |
| nmg | 2006 | 118.56 | 1.450 | 0.00746 | 613.24 | 0.0053316 |
| ln | 2006 | 2.43 | 0.895 | 0.01140 | 768.50 | 0.0022756 |
| jl | 2006 | 180.67 | 1.140 | 0.00208 | 633.20 | 0.0031011 |
| hlj | 2006 | 63.13 | 1.034 | 0.00173 | 583.45 | 0.0036447 |
| sh | 2006 | 7.73 | 0.574 | 0.00119 | 1887.51 | 0.0005291 |
| js | 2006 | 118.90 | 0.983 | 0.00228 | 894.23 | 0.0016585 |
| zj | 2006 | 12.80 | 0.857 | 0.00294 | 1245.13 | 0.0018792 |
| ah | 2006 | 1021.33 | 1.244 | 0.00201 | 422.69 | 0.0024159 |
| fj | 2006 | 935.40 | 0.789 | 0.00531 | 773.02 | 0.0024145 |
| jx | 2006 | 368.48 | 0.985 | 0.00283 | 510.15 | 0.0029553 |
| sd | 2006 | 216.49 | 1.108 | 0.00475 | 587.72 | 0.0022012 |
| hn | 2006 | 21.21 | 1.294 | 0.00368 | 445.00 | 0.0025165 |
| hb | 2006 | 290.29 | 0.894 | 0.00442 | 510.27 | 0.0031932 |
| hn | 2006 | 142.83 | 0.955 | 0.00544 | 526.42 | 0.0027097 |
| gd | 2006 | 84.48 | 0.563 | 0.00233 | 916.57 | 0.0018893 |
| gx | 2006 | 2504.36 | 0.757 | 0.00461 | 452.29 | 0.0019139 |
| hn | 2006 | 723.55 | 0.365 | 0.00693 | 668.33 | 0.0021028 |
| cq | 2006 | 489.08 | 0.791 | 0.00196 | 598.85 | 0.0035719 |
| sc | 2006 | 436.59 | 0.681 | 0.00538 | 447.32 | 0.0020160 |
| gz | 2006 | 291.24 | 1.411 | 0.01042 | 419.98 | 0.0030699 |
| yn | 2006 | 261.75 | 1.127 | 0.00552 | 515.52 | 0.0044277 |
| sx | 2006 | 596.13 | 1.253 | 0.00301 | 618.70 | 0.0030629 |
| gs | 2006 | 565.42 | 0.835 | 0.01308 | 568.65 | 0.0037554 |
| qh | 2006 | 306.58 | 0.479 | 0.00234 | 682.83 | 0.0087139 |
| nx | 2006 | 299.98 | 1.246 | 0.01134 | 660.42 | 0.0032967 |
| xj | 2006 | 537.21 | 0.734 | 0.00310 | 751.08 | 0.0070115 |
| bj | 2005 | 200.71 | 0.556 | 0.00537 | 3398.69 | 0.0009555 |
| tj | 2005 | 239.05 | 0.924 | 0.00873 | 1419.50 | 0.0010394 |
| hb | 2005 | 342.29 | 1.040 | 0.00477 | 474.31 | 0.0011078 |
| sx | 2005 | 167.89 | 2.086 | 0.00840 | 563.68 | 0.0033151 |
| nmg | 2005 | 206.19 | 1.444 | 0.00145 | 538.23 | 0.0032886 |
| ln | 2005 | 117.80 | 0.890 | 0.00955 | 749.70 | 0.0012680 |
| jl | 2005 | 2.40 | 1.142 | 0.00326 | 641.50 | 0.0018523 |
| hlj | 2005 | 180.18 | 1.066 | 0.00153 | 613.12 | 0.0017559 |
| sh | 2005 | 63.06 | 0.641 | 0.00200 | 2237.51 | 0.0004290 |
| js | 2005 | 7.69 | 0.993 | 0.00370 | 876.78 | 0.0010904 |
| zj | 2005 | 117.47 | 0.805 | 0.00278 | 1138.93 | 0.0009738 |
| ah | 2005 | 12.58 | 1.279 | 0.00202 | 395.10 | 0.0011896 |
| fj | 2005 | 975.62 | 0.789 | 0.01088 | 704.31 | 0.0016386 |
| jx | 2005 | 901.85 | 0.990 | 0.00377 | 438.31 | 0.0014451 |
| sd | 2005 | 366.07 | 1.069 | 0.00577 | 539.38 | 0.0008665 |
| hn | 2005 | 215.34 | 1.263 | 0.00375 | 378.62 | 0.0008476 |
| hb | 2005 | 21.09 | 0.878 | 0.00519 | 594.09 | 0.0015960 |
| hn | 2005 | 288.46 | 0.959 | 0.00540 | 511.28 | 0.0013942 |
| gd | 2005 | 142.48 | 0.560 | 0.00326 | 877.35 | 0.0012545 |
| gx | 2005 | 84.46 | 0.750 | 0.00686 | 393.30 | 0.0013305 |
| hn | 2005 | 2383.63 | 0.417 | 0.00158 | 565.77 | 0.0025558 |
| cq | 2005 | 717.23 | 0.765 | 0.00250 | 618.67 | 0.0013658 |
| sc | 2005 | 481.20 | 0.689 | 0.00653 | 442.31 | 0.0013967 |
| gz | 2005 | 436.02 | 1.346 | 0.00722 | 373.96 | 0.0012572 |
| yn | 2005 | 289.07 | 1.109 | 0.00473 | 446.05 | 0.0037668 |
| sx | 2005 | 260.00 | 1.115 | 0.00650 | 631.82 | 0.0014767 |
| gs | 2005 | 592.43 | 0.859 | 0.00794 | 469.56 | 0.0016239 |
| qh | 2005 | 567.36 | 0.418 | 0.00178 | 528.83 | 0.0054713 |
| nx | 2005 | 306.26 | 1.295 | 0.00630 | 609.62 | 0.0021935 |
| xj | 2005 | 299.36 | 0.701 | 0.00378 | 657.58 | 0.0044535 |
| bj | 2004 | 525.11 | 0.572 | 0.00258 | 3009.73 | 0.0009801 |
| tj | 2004 | 198.64 | 0.949 | 0.00430 | 1211.02 | 0.0010271 |
| hb | 2004 | 236.46 | 0.984 | 0.00304 | 396.68 | 0.0010310 |
| sx | 2004 | 341.32 | 1.994 | 0.00922 | 464.41 | 0.0019734 |
| nmg | 2004 | 168.76 | 1.494 | 0.00343 | 466.10 | 0.0031754 |
| ln | 2004 | 209.48 | 0.914 | 0.00740 | 640.45 | 0.0012429 |
| jl | 2004 | 116.99 | 1.020 | 0.00317 | 536.98 | 0.0017447 |
| hlj | 2004 | 2.37 | 0.984 | 0.00218 | 555.13 | 0.0017507 |
| sh | 2004 | 179.75 | 0.695 | 0.00116 | 2088.68 | 0.0004253 |
| js | 2004 | 63.03 | 0.972 | 0.00261 | 740.40 | 0.0010403 |
| zj | 2004 | 7.63 | 0.772 | 0.00180 | 1015.53 | 0.0009530 |
| ah | 2004 | 116.21 | 1.300 | 0.00331 | 342.64 | 0.0011526 |
| fj | 2004 | 12.31 | 0.699 | 0.00810 | 630.37 | 0.0015927 |
| jx | 2004 | 937.23 | 1.034 | 0.00380 | 365.59 | 0.0014441 |
| sd | 2004 | 874.61 | 0.931 | 0.00475 | 464.82 | 0.0008471 |
| hn | 2004 | 363.57 | 1.143 | 0.00339 | 306.44 | 0.0007792 |
| hb | 2004 | 214.10 | 0.883 | 0.00423 | 523.96 | 0.0015738 |
| hn | 2004 | 20.99 | 0.795 | 0.00361 | 406.69 | 0.0013120 |
| gd | 2004 | 285.09 | 0.578 | 0.00281 | 777.89 | 0.0012233 |
| gx | 2004 | 142.11 | 0.801 | 0.00285 | 328.45 | 0.0012212 |
| hn | 2004 | 84.39 | 0.643 | 0.00093 | 476.02 | 0.0025522 |
| cq | 2004 | 2294.00 | 0.791 | 0.00208 | 513.51 | 0.0011579 |
| sc | 2004 | 710.91 | 0.765 | 0.00890 | 382.11 | 0.0013973 |
| gz | 2004 | 473.52 | 1.328 | 0.00595 | 292.58 | 0.0011816 |
| yn | 2004 | 436.74 | 1.092 | 0.00359 | 396.55 | 0.0037835 |
| sx | 2004 | 286.81 | 1.038 | 0.00348 | 556.18 | 0.0014321 |
| gs | 2004 | 258.33 | 0.890 | 0.00839 | 405.84 | 0.0016034 |
| qh | 2004 | 588.57 | 0.498 | 0.00123 | 418.26 | 0.0052096 |
| nx | 2004 | 566.63 | 1.189 | 0.02179 | 504.05 | 0.0021194 |
| xj | 2004 | 307.17 | 0.740 | 0.00416 | 581.00 | 0.0044228 |
| bj | 2003 | 298.61 | 0.575 | 0.00431 | 2697.59 | 0.0009924 |
| tj | 2003 | 511.32 | 0.997 | 0.00652 | 1106.08 | 0.0010054 |
| hb | 2003 | 196.16 | 0.971 | 0.00289 | 342.74 | 0.0009660 |
| sx | 2003 | 234.23 | 1.974 | 0.00440 | 393.67 | 0.0019045 |
| nmg | 2003 | 340.10 | 1.562 | 0.00286 | 392.25 | 0.0031074 |
| ln | 2003 | 169.65 | 0.929 | 0.00532 | 535.97 | 0.0011899 |
| jl | 2003 | 211.75 | 1.006 | 0.00240 | 491.88 | 0.0016277 |
| hlj | 2003 | 116.14 | 0.967 | 0.00235 | 493.43 | 0.0017070 |
| sh | 2003 | 2.33 | 0.738 | 0.00088 | 1738.66 | 0.0003672 |
| js | 2003 | 179.31 | 0.981 | 0.00221 | 624.03 | 0.0008792 |
| zj | 2003 | 62.98 | 0.763 | 0.00205 | 847.42 | 0.0009511 |
| ah | 2003 | 7.57 | 1.372 | 0.00378 | 285.81 | 0.0011287 |
| fj | 2003 | 114.76 | 0.680 | 0.00550 | 561.33 | 0.0015670 |
| jx | 2003 | 12.07 | 0.902 | 0.00076 | 317.30 | 0.0014393 |
| sd | 2003 | 909.81 | 0.912 | 0.00542 | 409.96 | 0.0008358 |
| hn | 2003 | 859.06 | 1.078 | 0.00287 | 261.45 | 0.0007637 |
| hb | 2003 | 361.35 | 0.939 | 0.00482 | 444.63 | 0.0015446 |
| hn | 2003 | 212.81 | 0.791 | 0.00192 | 353.39 | 0.0012792 |
| gd | 2003 | 20.89 | 0.604 | 0.00330 | 694.29 | 0.0012301 |
| gx | 2003 | 284.82 | 0.744 | 0.00244 | 296.03 | 0.0012034 |
| hn | 2003 | 141.74 | 0.888 | 0.00154 | 406.15 | 0.0025758 |
| cq | 2003 | 84.33 | 0.862 | 0.00125 | 430.87 | 0.0011204 |
| sc | 2003 | 2226.92 | 0.788 | 0.00492 | 325.65 | 0.0013765 |
| gz | 2003 | 704.80 | 1.228 | 0.00446 | 246.54 | 0.0011707 |
| yn | 2003 | 467.29 | 1.037 | 0.00428 | 331.03 | 0.0037968 |
| sx | 2003 | 444.44 | 0.950 | 0.00453 | 506.41 | 0.0013623 |
| gs | 2003 | 284.56 | 0.913 | 0.00625 | 360.37 | 0.0015881 |
| qh | 2003 | 256.70 | 0.602 | 0.00140 | 373.86 | 0.0045667 |
| nx | 2003 | 584.23 | 1.472 | 0.00605 | 421.86 | 0.0020538 |
| xj | 2003 | 586.99 | 0.762 | 0.00368 | 522.96 | 0.0043245 |

Green investment :GI

Green energy consumption :GE

CO2 emissions:CO2

Economic growth:PGDP

Technological Innovation:TECH

Degree of openness : FDI

Strength of environmental regulations :ER

Urbanization level :URB

Industrial structures :STR

Per capita education expenditure :PEDU

Transportation convenience :TRAN

Proportion of coal consumption structure :COAL consumption
